# Supplementary material
Source: PubMed Central journal article supplement (PMC8391066)
Supplement: mmc1.pdf [file mmc1.pdf]

**Biophysical Journal, Volume 120**

**Supplemental information**

**Free energy and kinetics of cAMP permeation through connexin26 via applied voltage and milestoning**

**Wenjuan Jiang, Yi-Chun Lin, Wesley Botello-Smith, Jorge E. Contreras, Andrew L. Harris, Luca Maragliano, and Yun Lyna Luo**

# Supporting Information

## Free energy and kinetics of cAMP permeation through connexin26 via applied voltage and milestoning

Wenjuan Jiang<sup>#1</sup>, Yi-Chun Lin<sup>#1</sup>, Wesley Botello-Smith <sup>#1</sup>, Jorge Contreras<sup>\*2</sup>, Andrew L. Harris<sup>\*3</sup>, Luca Maragliano<sup>\*4,5</sup>, Yun Lyna Luo<sup>\*1</sup>

1. Department of Pharmaceutical Sciences, College of Pharmacy, Western University of Health Sciences, 309 E. Second St, Pomona, CA, USA.
2. Department of Physiology and Membrane Biology, School of Medicine, University of California, Davis, CA, USA
3. Department of Pharmacology, Physiology, and Neuroscience. New Jersey Medical School, Rutgers, The State University of New Jersey, Newark, NJ, USA.
4. Department of Life and Environmental Sciences, Polytechnic University of Marche, Ancona, Italy
5. Center for Synaptic Neuroscience and Technology, Italian Institute of Technology, Genoa, Italy.

# contribute equally

\* corresponding authors

Running title: cAMP permeation through hemichannel

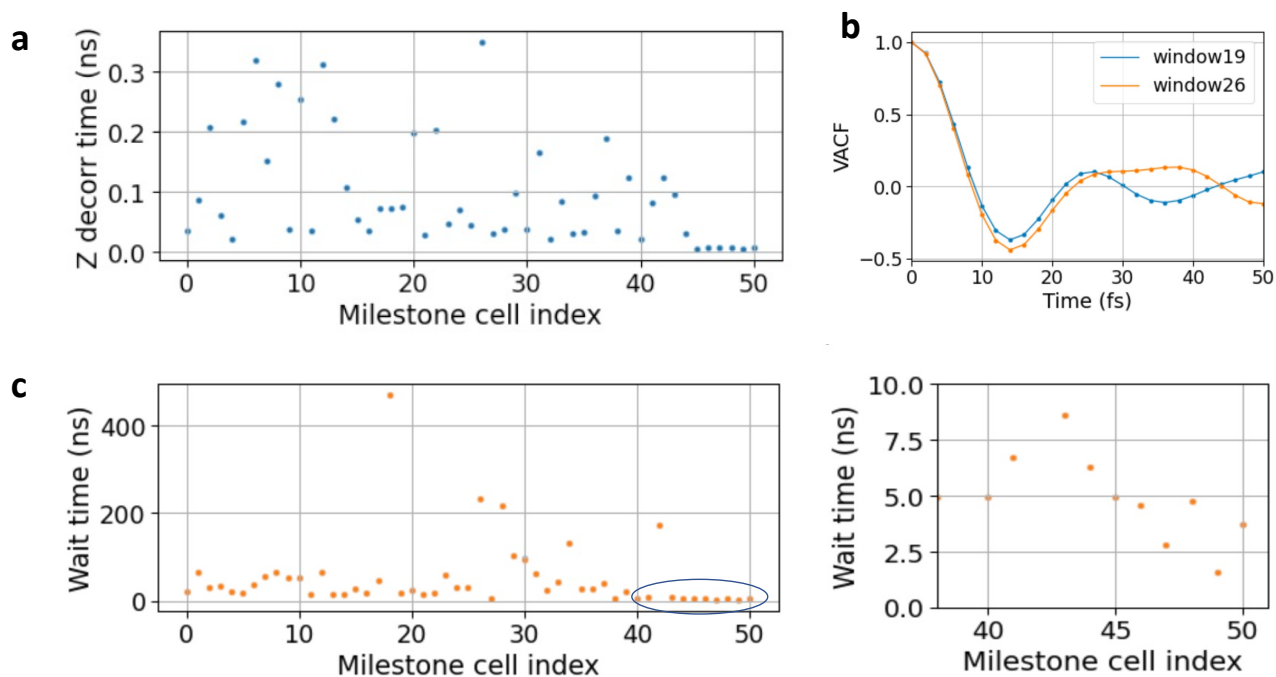

**Figure S1.** a) cAMP z-position decorrelation time in each milestone cell. b) cAMP z-velocity autocorrelation functions of window 19 (slowest position decorrelation) and window 26 (longest wait time). c) Average wait time of transition event in each milestone cell. The circled region is zoomed in on the right.

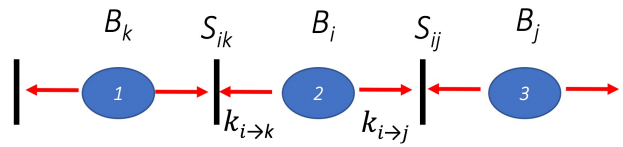

**a**

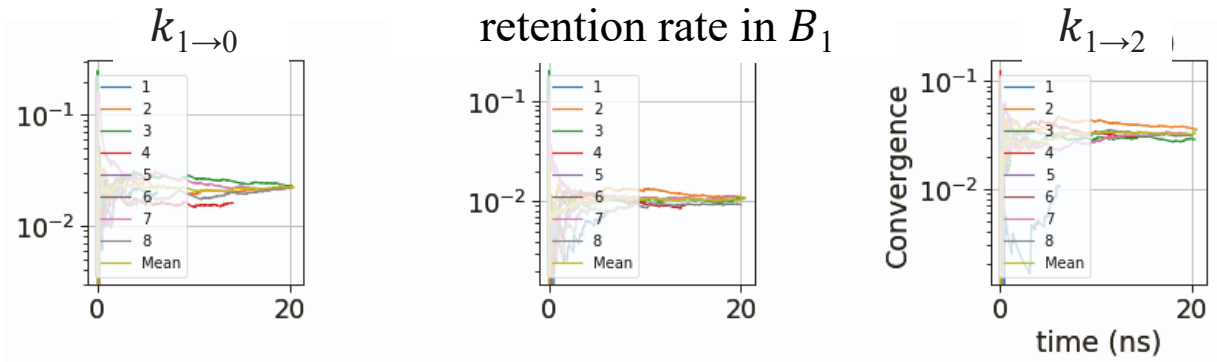

**b**

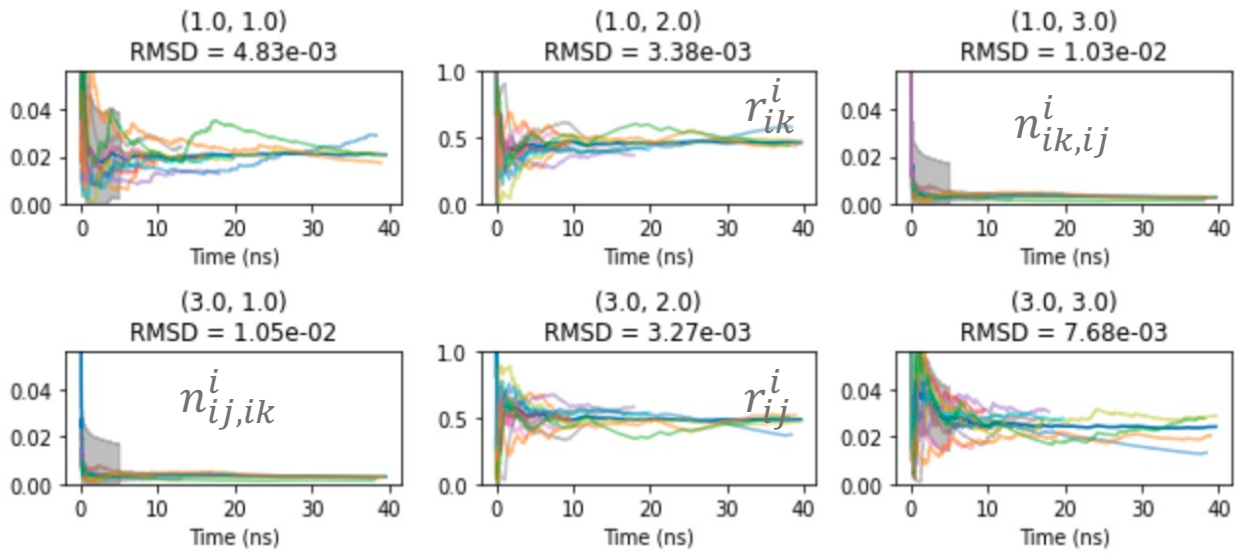

**c**

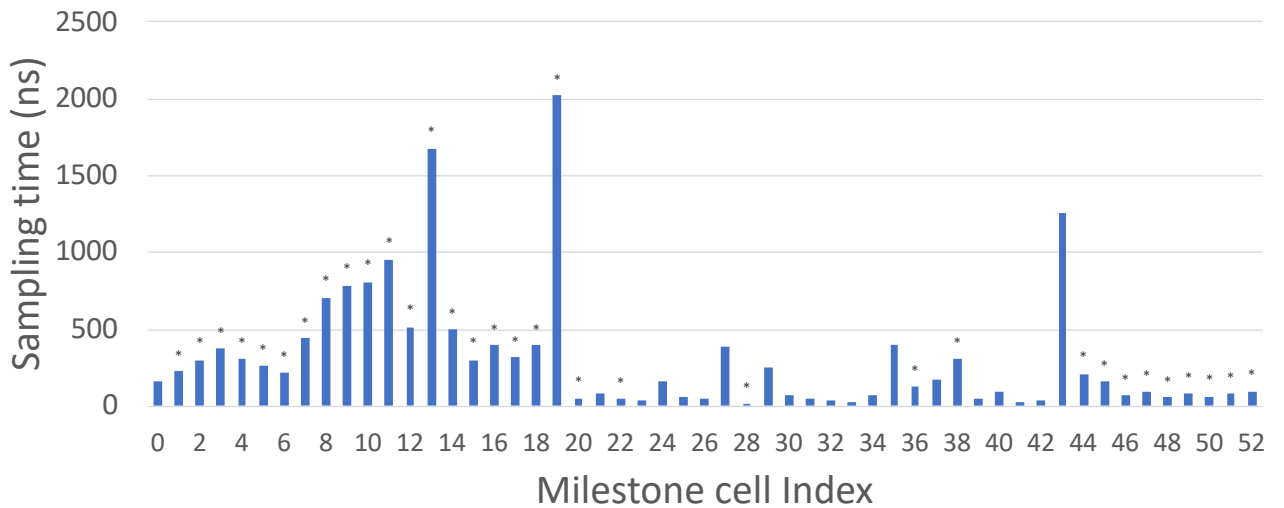

**Figure S2. a)** PMF convergence plots of a Voronoi cell for index 01 ( $B_1$ ) over time. The left and right plots represent the probability of the attempted escape to the left or right milestone states,  $k_{1\rightarrow 0}$  and  $k_{1\rightarrow 2}$ . The middle plot is the retention rate inside the cell. Colors represent different replicas and the mean of all the replicas. **b)** convergence plots for MFPT for milestone cell index 2 ( $B_2$ ). The upper right and lower left panels correspond to the frequencies of transitions from cell 1 to cell 3, and from cell 3 to cell 1, respectively ( $n_{ij,ik}^i$  and  $n_{ik,ij}^i$ ). The upper and lower center panels correspond to the percentage of time spent in cell 2 after last touching cell 1 and 3 ( $r_{ij}^i$ ), respectively. The other two entries are not used in analysis directly but would correspond to re-entering cell 1 or 3 after last visiting that same cell previously. The final 10 ns (last 10,000 frames) windowed relative RMSD is also given at the top of each panel as a measure of the degree of convergence for the corresponding rate matrix entry components. The convergence plots of all 53 cells are available on Github repository <https://github.com/LynaLuo-Lab/Connexin-cAMP-milestoning>. **c)** Total sampling time (ns) for each milestone cell (star indicating multi-replicas).

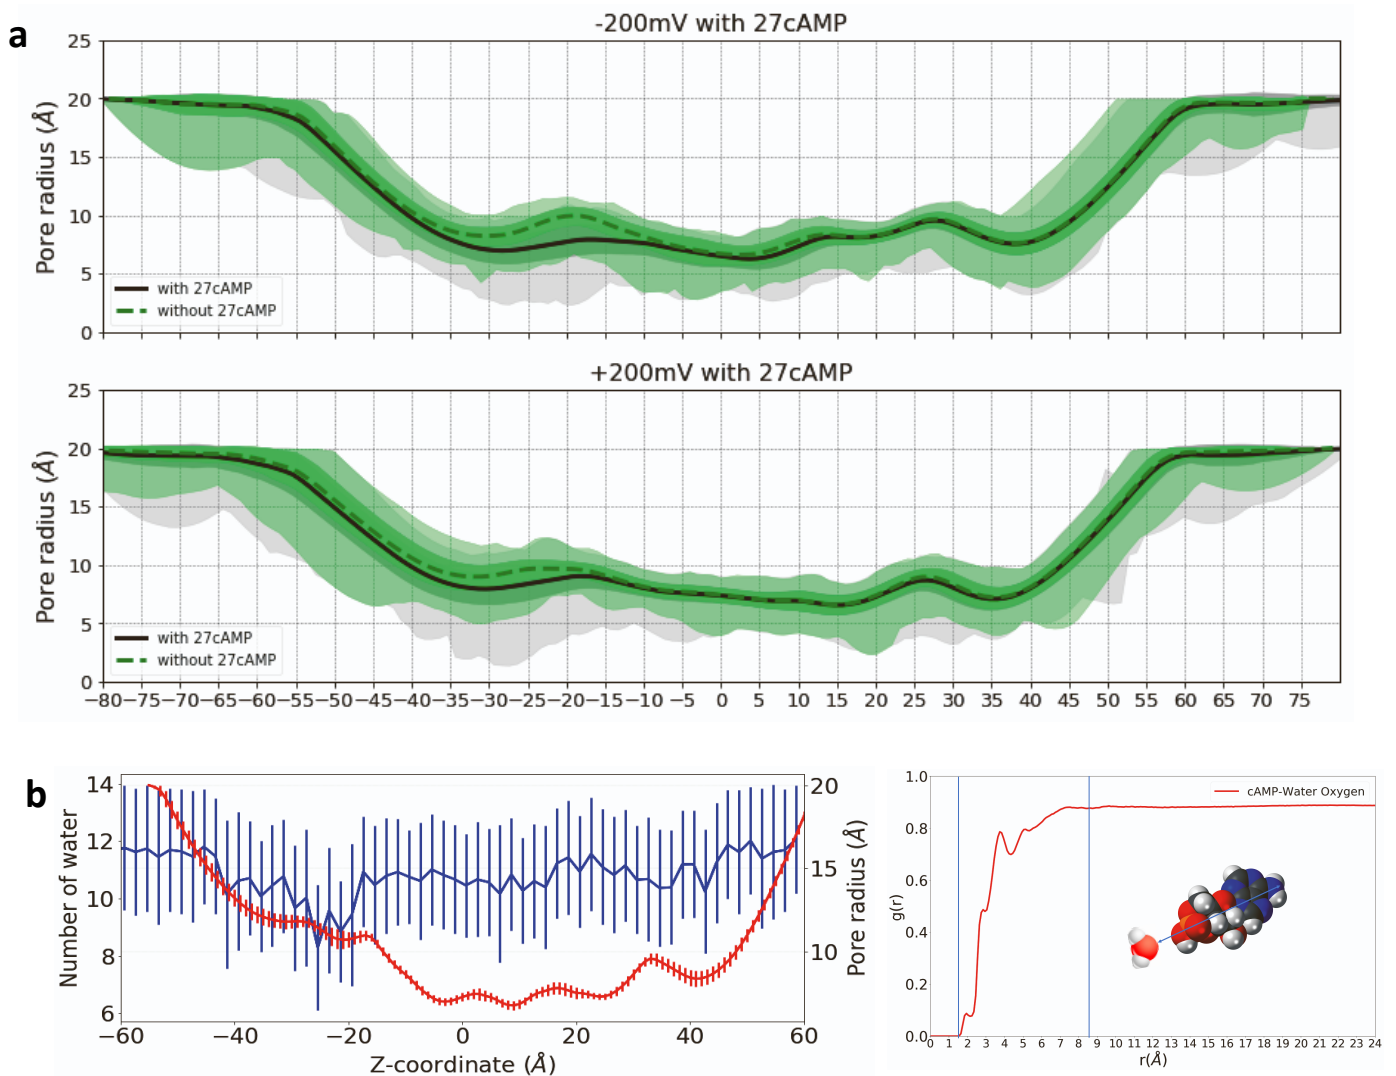

**Figure S3. a)** Pore radius profiles from two simulations under  $\pm 200$  mV, calculated using Hole program. The black line is the average value over last 1  $\mu$ s, with 1.2 ns interval between snapshots. The dark grey shade represents the  $\pm$  standard deviation, the light grey shade represents the minimum and maximum radius values. The dashed line and green shade are the pore radius profile with protein only. **b)** Average and standard deviation of the number of water molecules within 2.15  $\text{\AA}$  of cAMP (blue) at each z-position of the channel lumen computed from milestoning simulations, aligned with the average and standard deviation of pore radius (red). The 2.15 cutoff distance is determined from the radial distribution function of cAMP and water oxygen computed from trajectory of cAMP in bulk (right).

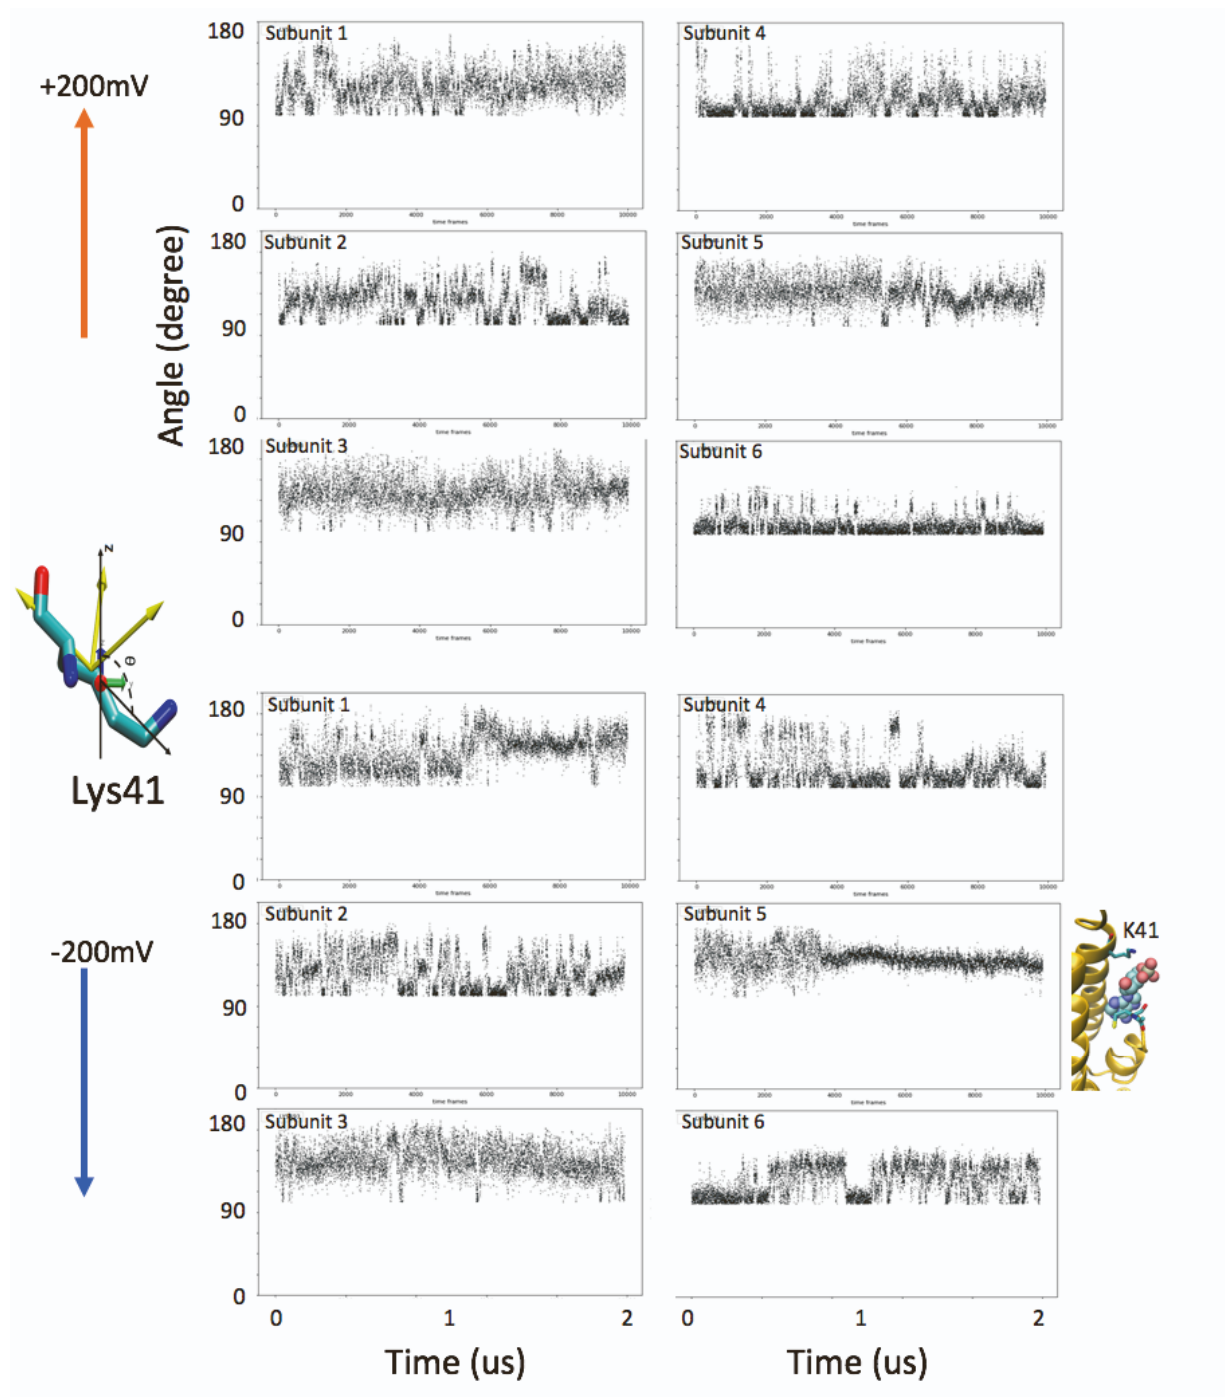

**Figure S4a.** Fluctuation of the angles between the principal axis of Lys41 and z-vector in each subunit under +/-200 mV. Representative Lys residue shown in the licorice model with its principal axes and the angle plotted.

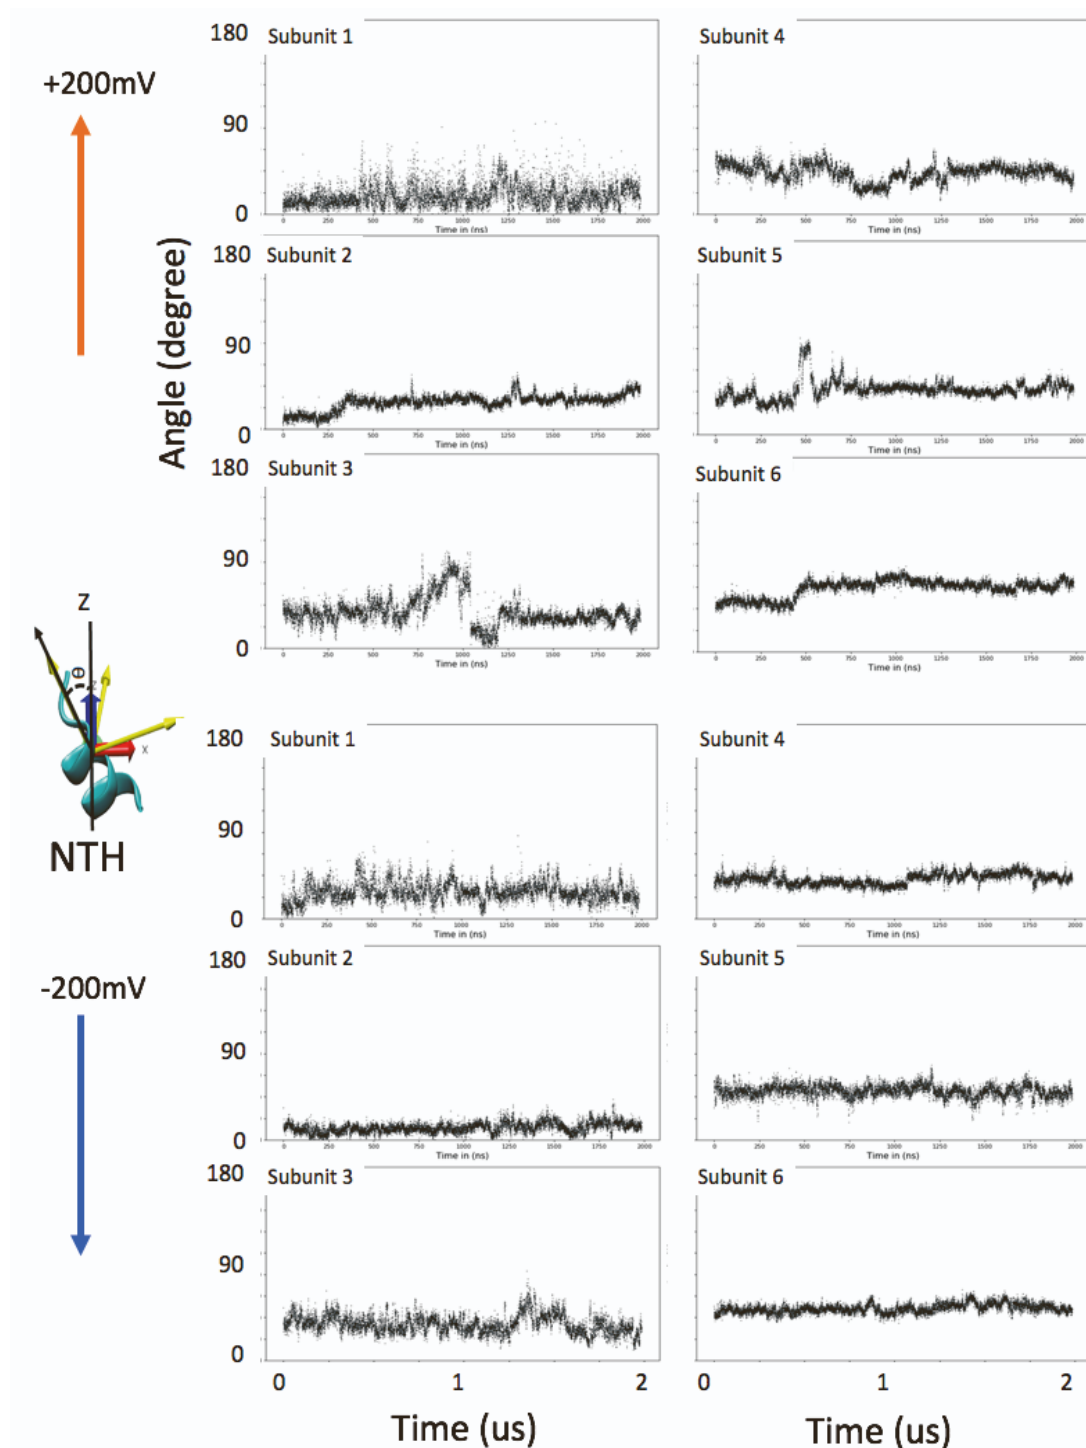

**Figure S4b.** Fluctuation of the angles between the principal axis of NTH (1-11) and z-vector in each subunit under +/-200 mV. Representative NTH shown in the new cartoon model with its principal axes and the angle plotted.

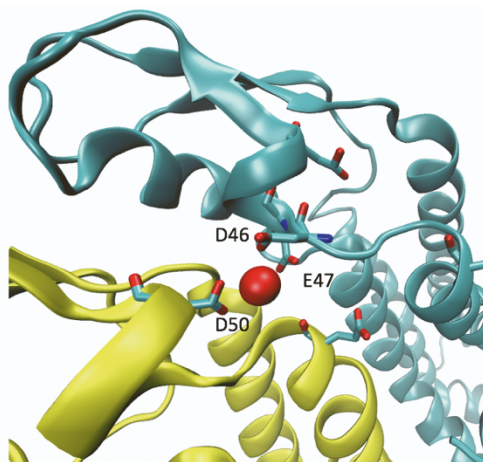

**Figure S5.** One  $Mg^{2+}$  (red ball) binds to the calcium-binding site (D50, D46, E47) for 1.5  $\mu s$  during the voltage simulation, which contains 27  $Mg^{2+}$  in the whole system.

**Table S1.** Optimized CHARMM general force field (CGenFF) parameters for cAMP, available at <https://github.com/LynaLuo-Lab/Connexin-cAMP-milestoning>.

| BONDS     |        |        |        |       |    |       |
|-----------|--------|--------|--------|-------|----|-------|
| CG3RC1    | OG3R60 | 334.3  | 1.411  |       |    |       |
| OG3R60    | PG1    | 237    | 1.61   |       |    |       |
| ANGLES    |        |        |        |       |    |       |
| CG3RC1    | CG321  | OG3R60 | 75.7   | 110.1 |    |       |
| CG321     | CG3RC1 | OG3C51 | 45     | 111.5 |    |       |
| CG3C51    | CG3RC1 | OG3R60 | 58     | 106.5 | 8  | 2.561 |
| CG3RC1    | CG3RC1 | OG3R60 | 53.35  | 111   | 8  | 2.561 |
| OG3R60    | CG3RC1 | HGA1   | 45.9   | 108.5 |    |       |
| CG3C51    | OG3C51 | CG3RC1 | 170    | 109   |    |       |
| CG321     | OG3R60 | PG1    | 20     | 120   | 35 | 2.33  |
| CG3RC1    | OG3R60 | PG1    | 20     | 120   | 35 | 2.33  |
| OG2P1     | PG1    | OG3R60 | 98.9   | 107.5 |    |       |
| OG3R60    | PG1    | OG3R60 | 80     | 104.3 |    |       |
| DIHEDRALS |        |        |        |       |    |       |
| OG3R60    | CG321  | CG3RC1 | CG3RC1 | 0.6   | 1  | 0     |
| OG3R60    | CG321  | CG3RC1 | CG3RC1 | 0.45  | 2  | 0     |
| OG3R60    | CG321  | CG3RC1 | CG3RC1 | 0.7   | 3  | 0     |
| OG3R60    | CG321  | CG3RC1 | OG3C51 | 3.4   | 1  | 180   |
| OG3R60    | CG321  | CG3RC1 | HGA1   | 0.195 | 3  | 0     |

| DIHEDRALS |        |        |        |       |   |     |
|-----------|--------|--------|--------|-------|---|-----|
| OG311     | CG3C51 | CG3RC1 | OG3R60 | 0     | 3 | 0   |
| HGA1      | CG3C51 | CG3RC1 | OG3R60 | 0.195 | 3 | 0   |
| CG3C51    | CG3C51 | OG3C51 | CG3RC1 | 0.5   | 3 | 0   |
| NG2R51    | CG3C51 | OG3C51 | CG3RC1 | 0     | 3 | 0   |
| HGA1      | CG3C51 | OG3C51 | CG3RC1 | 0.3   | 3 | 0   |
| CG321     | CG3RC1 | CG3RC1 | OG3R60 | 0.15  | 3 | 0   |
| OG3C51    | CG3RC1 | CG3RC1 | OG3R60 | 1.2   | 3 | 0   |
| OG3R60    | CG3RC1 | CG3RC1 | HGA1   | 0.15  | 3 | 0   |
| CG321     | CG3RC1 | OG3C51 | CG3C51 | 0.3   | 3 | 0   |
| CG3RC1    | CG3RC1 | OG3C51 | CG3C51 | 0     | 3 | 0   |
| HGA1      | CG3RC1 | OG3C51 | CG3C51 | 0.3   | 3 | 0   |
| CG3C51    | CG3RC1 | OG3R60 | PG1    | 2.553 | 1 | 180 |
| CG3RC1    | CG3RC1 | OG3R60 | PG1    | 1.5   | 1 | 180 |
| CG3RC1    | CG3RC1 | OG3R60 | PG1    | 0.625 | 2 | 180 |
| CG3RC1    | CG3RC1 | OG3R60 | PG1    | 0.488 | 1 | 180 |
| CG3RC1    | CG3RC1 | OG3R60 | PG1    | 0.972 | 3 | 180 |
| HGA1      | CG3RC1 | OG3R60 | PG1    | 1.903 | 1 | 0   |
| HGA1      | CG3RC1 | OG3R60 | PG1    | 0.089 | 3 | 180 |
| CG321     | OG3R60 | PG1    | OG2P1  | 0.1   | 3 | 0   |
| CG321     | OG3R60 | PG1    | OG3R60 | 2.248 | 1 | 180 |
| CG321     | OG3R60 | PG1    | OG3R60 | 0.261 | 2 | 0   |
| CG321     | OG3R60 | PG1    | OG3R60 | 2.64  | 3 | 180 |

|        |        |        |        |       |   |     |
|--------|--------|--------|--------|-------|---|-----|
| HGA2   | CG321  | CG3RC1 | OG3C51 | 0.16  | 3 | 0   |
| CG3RC1 | CG321  | OG3R60 | PG1    | 0.002 | 1 | 180 |
| CG3RC1 | CG321  | OG3R60 | PG1    | 1.14  | 2 | 180 |
| CG3RC1 | CG321  | OG3R60 | PG1    | 0.086 | 3 | 0   |
| HGA2   | CG321  | OG3R60 | PG1    | 0.599 | 3 | 0   |
| CG3RC1 | CG3C51 | CG3C51 | NG2R51 | 0     | 3 | 0   |
| CG3RC1 | CG3C51 | CG3C51 | OG3C51 | 0     | 3 | 0   |
| CG3C51 | CG3C51 | CG3RC1 | OG3R60 | 2     | 3 | 180 |
| CG3C51 | CG3C51 | CG3RC1 | OG3R60 | 0.4   | 5 | 0   |
| CG3C51 | CG3C51 | CG3RC1 | OG3R60 | 0.8   | 6 | 0   |

**Table S2.** Description of the computational systems

|             | Voltage   | term patching | Disulfide bonds                 | Box (Å <sup>3</sup> ) | Number (concentration*) |              |                                                   |            |
|-------------|-----------|---------------|---------------------------------|-----------------------|-------------------------|--------------|---------------------------------------------------|------------|
|             |           |               |                                 |                       | atoms                   | cAMP         | K <sup>+</sup> /Mg <sup>2+</sup> /Cl <sup>-</sup> | POPC/water |
| Anton2      | +/- 200mV | ACE CT1       | C53-C180<br>C60-C174 C64-C169   | 122× 122x 154         | 237030                  | 27 (26.5 mM) | 82/27/163 (80/26/160 mM)                          | 323/56569  |
| Milestoning | 0 mV      | ACE CT1       | C53-C180<br>C60-174<br>C64-C169 | 121x 121x 155         | 234652                  | 1 (1 mM)     | 82/1/137 (81/1/135 mM)                            | 324/56191  |

\*Concentrations were calculated based on number of water molecules.

**Table S3.** Transition time and dwell time (ns) from 2 μs trajectories at +200 mV and -200 mV.

| Transition Event | +200mV (inward flux)        |                         |                              | -200mV (outward flux)       |                         |                              |
|------------------|-----------------------------|-------------------------|------------------------------|-----------------------------|-------------------------|------------------------------|
|                  | Transition Time<br>-50<z<50 | Dwell time<br>-50<z<-20 | Barrier crossing<br>-20<z<50 | Transition Time<br>-50<z<50 | Dwell time<br>-50<z<-20 | Barrier crossing<br>-20<z<50 |
| 1                | 222                         | 24                      | 198                          | 160                         | 110                     | 50                           |
| 2                | 1218                        | 1058                    | 160                          | 242                         | 210                     | 32                           |
| 3                | 416                         | 308                     | 108                          | 290                         | 50                      | 240                          |
| 4                | 282                         | 248                     | 34                           | 1496                        | 1400                    | 96                           |
| 5                | 542                         | 498                     | 44                           | 230                         | 162                     | 68                           |
| 6                | 290                         | 149                     | 140                          | 630                         | 570                     | 60                           |
| 7                | 192                         | 120                     | 72                           | 384                         | 350                     | 34                           |
| 8                | 454                         | 222                     | 232                          | 152                         | 100                     | 52                           |



|              |          |         |        |          |          |        |
|--------------|----------|---------|--------|----------|----------|--------|
| 9            | 426      | 150     | 276    | 1410     | 1228     | 182    |
| 10           |          |         |        | 198      | 76       | 122    |
| 11           |          |         |        | 390      | 150      | 240    |
| 12           |          |         |        | 445      | 350      | 95     |
| Raw mean     | 449      | 308     | 140    | 502      | 396      | 105    |
| Sample mean* | 448      | 305     | 143    | 510      | 398      | 106    |
| 95% CI*      | 204-1646 | 149-940 | 79-330 | 249-1571 | 205-1086 | 54-290 |

\*The sample mean and confidence intervals are based on Maximum Likelihood Estimate by fitting the exponential distributions (see code at [https://github.com/LynaLuo-Lab/MD-data-uncertainty-analysis/blob/master/confidence\\_interval\\_exponential.ipynb](https://github.com/LynaLuo-Lab/MD-data-uncertainty-analysis/blob/master/confidence_interval_exponential.ipynb)).
