# Supplementary material
Source: PubMed Central journal article supplement (PMC8391066)
Supplement: mmc3.pdf [file mmc3.pdf]

# Free energy and kinetics of cAMP permeation through connexin26 via applied voltage and milestoning

Wenjuan Jiang,<sup>1</sup> Yi-Chun Lin,<sup>1</sup> Wesley Botello-Smith,<sup>1</sup> Jorge E. Contreras,<sup>2,\*</sup> Andrew L. Harris,<sup>3,\*</sup> Luca Maragliano,<sup>4,5,\*</sup> and Yun Lyna Luo<sup>1,\*</sup>

<sup>1</sup>Department of Pharmaceutical Sciences, College of Pharmacy, Western University of Health Sciences, Pomona, California; <sup>2</sup>Department of Physiology and Membrane Biology, School of Medicine, University of California, Davis, California; <sup>3</sup>Department of Pharmacology, Physiology, and Neuroscience, New Jersey Medical School, Rutgers, The State University of New Jersey, Newark, New Jersey; <sup>4</sup>Department of Life and Environmental Sciences, Polytechnic University of Marche, Ancona, Italy; and <sup>5</sup>Center for Synaptic Neuroscience and Technology, Italian Institute of Technology, Genoa, Italy

**ABSTRACT** The connexin family is a diverse group of highly regulated wide-pore channels permeable to biological signaling molecules. Despite the critical roles of connexins in mediating selective molecular signaling in health and disease, the basis of molecular permeation through these pores remains unclear. Here, we report the thermodynamics and kinetics of binding and transport of a second messenger, adenosine-3',5'-cyclophosphate (cAMP), through a connexin26 hemichannel (Cx26). First, inward and outward fluxes of cAMP molecules solvated in KCl solution were obtained from 4  $\mu$ s of  $\pm$  200 mV simulations. These fluxes data yielded a single-channel permeability of cAMP and cAMP/K<sup>+</sup> permeability ratio consistent with experimentally measured values. The results from voltage simulations were then compared with the potential of mean force (PMF) and the mean first passage times (MFPTs) of a single cAMP without voltage, obtained from a total of 16.5  $\mu$ s of Voronoi-tessellated Markovian milestoning simulations. Both the voltage simulations and the milestoning simulations revealed two cAMP-binding sites, for which the binding constants  $K_D$  and dissociation rates  $k_{off}$  were computed from PMF and MFPTs. The protein dipole inside the pore produces an asymmetric PMF, reflected in unequal cAMP MFPTs in each direction once within the pore. The free energy profiles under opposite voltages were derived from the milestoning PMF and revealed the interplay between voltage and channel polarity on the total free energy. In addition, we show how these factors influence the cAMP dipole vector during permeation, and how cAMP affects the local and nonlocal pore diameter in a position-dependent manner.

**SIGNIFICANCE** Connexins are wide-pore channels permeable to cellular signaling molecules. They mediate molecular signaling crucial in physiology, pathology, and development; mutations in connexins cause human pathologies. However, the fundamental structural, thermodynamic, and kinetic determinants of molecular permeability properties are unknown. Using multiple molecular dynamics simulation techniques, we report an in-depth investigation of the free energy and the directional transition rates of an important biological signaling molecule, adenosine-3',5'-cyclophosphate, through a connexin channel. We reveal the energetics and binding sites that determine the adenosine-3',5'-cyclophosphate flux, and the effects of mobile ions and external electrical field on the process. The results provide a basis for understanding the unique features of molecular flux through connexins and other wide-pore channels.

## INTRODUCTION

Many protein channels are known to have pores sufficiently wide enough to mediate the permeation of small molecules,

here defined as having molecular mass between 100 and 1000 Da, in addition to atomic ions. Wide-pore channels fall into two structural categories: channels in which the basic pore structure is formed by curved and closed  $\beta$ -sheet ( $\beta$ -barrel channels) and channels in which the pore is formed by transmembrane  $\alpha$ -helical domains roughly normal to the plane of the membrane. The former are found in prokaryotes and in the prokaryotic-derived organelles (chloroplasts and mitochondria) of eukaryotes. Well-known examples include VDAC (voltage-dependent anion channel) and the extensive bacterial porin family (1). Non- $\beta$ -barrel

Submitted January 13, 2021, and accepted for publication June 17, 2021.

\*Correspondence: [jecontrer@ucdavis.edu](mailto:jecontrer@ucdavis.edu) or [aharris@njms.rutgers.edu](mailto:aharris@njms.rutgers.edu) or [Luca.Maragliano@iit.it](mailto:Luca.Maragliano@iit.it) or [luoy@westernu.edu](mailto:luoy@westernu.edu)

Wenjuan Jiang, Yi-Chun Lin, and Wesley Botello-Smith contributed equally to this work.

Editor: Michael Grabe.

<https://doi.org/10.1016/j.bpj.2021.06.024>

© 2021 Biophysical Society.

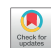

wide channels are found in eukaryotic and some bacterial plasma membranes. In eukaryotes, they include connexins, pannexins, innexins, calcium homeostasis modulator and volume-regulated anion channel (2,3). The fundamental backbone structures of the two classes of pores differ greatly, which likely has consequences for the dynamics and mechanisms of molecular permeation and selectivity. Although biological signaling molecules are known to permeate the eukaryotic wide pores, the mechanism of permeation has not been explored computationally to date.

Connexin proteins can function as plasma membrane channels (“hemichannels”) or as intercellular channels (“gap junction channels”), which allow direct transfer of small cytoplasmic molecules between cells. The intercellular channels are formed by end-to-end docking of two hemichannels across the extracellular gap between adjacent cells. The pores are permeable to atomic ions and small molecules in the size-range of key cellular signaling molecules including cAMP, cGMP, ATP, IP<sub>3</sub>, and glutathione. Each of the 21 human connexin isoforms are composed of channels with distinct permeability and regulatory properties (4,5). With the exception of electrical signaling in excitable tissues, the primary biological function of connexin channels is to mediate movement of small cytoplasmic signaling molecules and metabolites between cells and/or to release them into the extracellular environment in a highly regulated manner. Mutations in connexins that alter channel function or expression produce human pathologies (6,7). These mutations ultimately exert their pathological effects by disrupting the proper molecular permeability of junctional and/or plasma membranes.

A large literature documents that channels formed by the different connexin isoforms have dramatically different permeability properties. Their unitary conductances range from 10 to 300 pS, their cation/anion permeability ratios ( $P_{K^+}/P_{Cl^-}$ ) range from 8.0 to 0.8, and their permeabilities to fluorescent tracers are highly disparate. Strikingly, none of these parameters correlate with each other (e.g., the connexin channel with the largest unitary conductance is among the most size-restrictive). Quantitative measurements of permeability to biological signaling molecules are difficult to obtain as the molecules are not fluorescent and do not carry significant current in the presence of physiological saline. Nevertheless, it is clear that among the different connexin channels, permeabilities to biological signaling molecules are quite distinct. Furthermore, for a given type of connexin channel, there are remarkable degrees of selectivity and relative permeability among biological permeants. These connexin-specific and permeant-specific permeability properties are not reasonably inferred from differences in permeabilities to fluorescent tracers (8).

Molecular dynamics (MD) simulation has been used to study the permeation of various small molecules through channels. Most studies have focused on  $\beta$ -barrel channels, including ATP transport through VDAC (9,10), various substrates transported through Omp (11–15), and DNA and

peptide translocation through  $\alpha$ -hemolysin (16–19). Permeation of molecules with mass less than 100 Da, such as urea, glycerol, and acetate, through highly selective and relatively narrow non- $\beta$ -barrel pores have also been computationally studied (e.g., aquaporins (20–24), acetate channels (25), and urea channels (26,27)). To our knowledge, this is the first computational study of a biological relevant molecule crossing a non- $\beta$ -barrel wide-pore channel.

Previous work refined the open state connexin26 (Cx26) crystal structure using all-atom MD simulation and reproduced the experimental single-channel conductance to atomic ions with Grand Canonical Monte Carlo Brownian dynamics simulations (28). Using this model, we have explored the free energy profiles of uncharged permeant and nonpermeant tracer molecules (~500 Da) with Hamiltonian replica-exchange umbrella sampling (29). That study indicated that the determinants of molecular permeation differ from those that dominate the permeation of atomic ions, emphasizing the unique aspects of small molecules with conformational and orientational degrees of freedom in a wide pore. However, although validating the atomistic system and overall free energy profiles, quantitative kinetic information of the permeation process is still missing. Furthermore, the results using uncharged tracer molecules do not characterize the biomedically crucial process of permeation by biological signaling molecules, which typically are charged. This study explores the binding and transport kinetics of a negatively charged second messenger, adenosine-3',5'-cyclophosphate (cAMP), as it permeates a connexin pore. Not only is cAMP an important signaling molecule known to permeate connexin channels (8,30,31), its experimentally assessed transit time from two independent groups is in the range of low microseconds (32,33), making it suitable for investigation by atomistic simulation. In addition, the size of cAMP is similar to the sugar permeant we previously simulated in Cx26 but differs in molecular charge (29).

All-atom MD simulation of a single permeation event with a timescale of submicrosecond to microseconds is within reach of today's computational power. However, a large number of transition events are required to obtain meaningful statistics, for which simulations orders of magnitude longer than the mean transition time are required. For a charged molecule such as cAMP, permeation can be accelerated by imposing a voltage or concentration gradient. Theoretically, if the system reaches a steady state, a mean flux rate and a steady-state density profile can be obtained from the ensemble of nonequilibrium processes using a sufficient number of permeation events. However, the effect of an unphysiologically large voltage or electrochemical gradient on channel property is likely system dependent and difficult to predict over a long simulation time.

Because a permeation process is a mix of small barrier crossing (diffusive) process and large barrier crossing (binding/unbinding) processes, the overall rate is often dominated

by the free energy profile or potential of mean force (PMF) along the channel axis. Various methods have been developed to estimate the transition rate from PMF, such as the Smoluchowski diffusion model or a reactive flux model. Previously we estimated the relative transition rates of two sugar molecules through Cx26 using transition state theory based on PMF profiles (29). However, transition state theory requires assumptions such as a single dominant transition state and no recrossing at the barriers, which are often difficult to satisfy even for a simple ion pair dissociation (34). Alternatively, a class of rare-event sampling techniques have been developed, such as Markov state models (MSM) (35), milestoning (36), weighted ensemble path sampling (37–39). Those techniques allow extraction of kinetic quantities directly from short MD simulations, without assumptions on single-barrier crossing or computing the position-dependent diffusion coefficient. A notable application of MSM in a wide-pore channel is ATP permeation through VDAC (10).

Voronoi-tessellated Markovian milestoning is a version of milestoning that allows reconstruction of the long-time dynamics of a system from independent simulations confined within a set of cells spanning the space of the reaction coordinates (40). Compared with conventional MSM, milestoning does not require the definition of a lag time. In addition, the Markovian assumption in Markovian milestoning refers to transitions between hypersurfaces of the phase space (milestones), which makes it easier to be satisfied or approximated than in MSM, in which transitions between regions of space are considered (41). Indeed, it was shown that Markovian milestoning yields exact mean first passage times (MFPTs) if the milestones are chosen such that successive transitions between them are statistically independent (40,41). This method has successfully captured the rates of CO entry/exit in myoglobin (42) and protein-ligand binding kinetics (43).

Here, we make use of the “soft-walls” Voronoi-tessellated Markovian milestoning (referred to as “milestoning” hereafter), which confines the sampling within the Voronoi cells using flat-bottom harmonic restraining potentials (44). This approach is easy to implement, allowing us to take advantage of CUDA-accelerated MD engine, and has been shown to yield the same results as the original “hard-walls” version, which instead inverts atomic velocities at the cell boundaries. The “soft-walls” version has been used to study nucleation of an ionic liquid (45) and ion permeation across a paracellular channel (46) and a nicotinic acetylcholine receptor (47). In this study, we use milestoning to reconstruct the kinetics of a single cAMP molecule permeation through an open Cx26 hemichannel. Using both nonequilibrium and rare-event sampling approaches, our results revealed that the steady-state distribution of cAMP inside the channel captures similar energetic barrier and binding sites as from milestoning, though opposite voltages exert different perturbation on the cAMP permeation kinetics because of the intrinsic protein dipole.

## MATERIALS AND METHODS

### Force field and cAMP parameterization

CHARMM36 force field was used for protein (48,49), 1-palmitoyl-2-oleoyl-phosphatidylcholine (POPC) lipids (50), KCl, and TIP3P water (51). Mg<sup>2+</sup> parameters were from Yoo and Aksimentiev (52), in which the van der Waals (vdW) interaction parameters were fine-tuned to reproduce experimental osmotic pressure. For cAMP, force field parameters were first generated from CHARMM CGenFF (53). Additional dihedral fitting between imidazole and pyran groups in the cAMP structure was performed in VMD fTK plugin (54). The final optimized cAMP parameters are provided in Table S1 and available at <https://github.com/LynaLuo-Lab/Connexin-cAMP-milestoning>.

### System setup and equilibrium protocol

The atomistic model of Cx26 hemichannel was taken from our previous work (29). The system of Cx26 embedded in a solvated POPC bilayer with ions and TIP3P water molecules was built and equilibrated following the step-by-step protocol used in Membrane Builder on CHARMM-GUI website (55,56). The terminal amino acid of each segment was capped using acetylated N-terminus and methylated C-terminus. Three disulfide bonds were added between the residue pairs of C53 and C180, C64 and C169, and C60 and C174, respectively, per protomer, so the entire channel contained a total of 18 disulfide bonds, consistent with the original crystal structure of the Cx26 junctional channel (Protein Data Bank: 2ZW3). Recent cryo-EM of purified Cx26 hemichannels in nanodiscs confirms that the hemichannel structure is essentially the same as that in junctional channels (57). Two systems containing a single cAMP for milestoning simulations and 27 cAMP molecules for nonequilibrium simulations were constructed. K<sup>+</sup> and Cl<sup>−</sup> ions were added to mimic physiological salt concentration and also to neutralize the protein charge. In addition, Mg<sup>2+</sup> ions were added in 1:1 ratio with cAMP to explore whether copermeation of Mg<sup>2+</sup> and cAMP exists (see Table S2 for system details). The system was energy minimized and serially equilibrated in NVT and NPT ensembles with positional restraints using AMBER18 (58). Temperature was maintained at 310.15 K using Langevin thermostat (59,60) and 1 atm was maintained by Monte Carlo barostat pressure control (61,62). The time step was 2 fs. Cutoff for calculating vdW interactions and short-range electrostatic interactions was set at 12 Å and force-switched at 10 Å. Long-range electrostatic interactions were calculated using the particle mesh Ewald algorithm (63).

### Voltage simulation protocol

After 35 ns of equilibrium simulation using AMBER18, the system was run on Anton2 supercomputer with 2.0 fs timestep. Lennard-Jones interactions were truncated at 11–13 Å, and long-range electrostatics were evaluated using the k-Gaussian Split Ewald method (64). Pressure regulation was accomplished via the Martyna-Tobias-Klein barostat, to maintain one bar of pressure, with a  $\tau$ -parameter of 0.0416667 ps and reference temperature of 310.15 K. The barostat period was set to the default value of 480 ps per timestep. Temperature control was accomplished via the Nosé-Hoover thermostat with the same  $\tau$ -parameter. The mts parameter was set to four timesteps for the barostat control and one timestep for the temperature control. The thermostat interval was set to the default value of 24 ps per timestep. A 600 ns equilibrium simulation was finished before applying voltage. Constant electric fields of −200 or +200 mV, respectively, were added for 2  $\mu$ s of simulation time with trajectories saved every 200 ps.

### Markovian milestoning

For a molecular permeation event through a channel, it is reasonable to consider the progression of the permeant along the pore axis as the reaction coordinate. This allowed us to define a set of Voronoi cells along the axis coordinate, and to identify the milestones as the boundaries between the

cells. We then ran many local simulations confined in the cells and collected kinetics of transitions between milestones. In detail, we introduced a set of  $M$  Voronoi cells  $B_i$ ,  $i = 1, \dots, M$ . If  $k_{i \rightarrow j}$  is the rate of attempted escape from cells  $B_i$  to  $B_j$ , because at statistical equilibrium the total flux in and out of each cell is zero, the equilibrium probability  $\pi_i$  for the permeant to be in cell  $B_i$  satisfies a balance equation:

$$\sum_{j=1, j \neq i} \pi_j k_{j \rightarrow i} = \sum_{j=1, j \neq i} \pi_i k_{i \rightarrow j}, \quad \sum_{i=1} \pi_i = 1. \quad (1)$$

The free energy of each cell can be obtained from the solution of Eq. 1 as  $-k_B T \ln(\pi_i)$ . By defining a milestone  $S_{ij}$  as the boundary between two adjacent Voronoi cells  $B_i$  and  $B_j$ , the dynamics of the system is reduced to that of a Markov chain in the state space of the milestone indices (40). The MFPT between any pair of milestones  $S_{ij}$  and  $S_{ik}$  can hence be calculated from the rate matrix whose elements  $q_{ij,ik}$ , the rate of moving from milestone  $S_{ij}$  to  $S_{ik}$ , are given by Eq. 2:

$$q_{ij,ik} = \frac{\pi_i n_{ij,ik}^i}{\pi_i r_{ij}^i + \pi_j r_{ij}^j}, \quad (2)$$

where  $n_{ij,ik}^i$  is the number of transitions from  $S_{ij}$  to  $S_{ik}$ , normalized by the time spent in cell  $B_j$ , and  $r_{ij}^i$  is the time passed in cell  $B_i$  after having hit  $S_{ij}$  before hitting any other milestone, normalized by the total time spent in cell  $B_i$ . The inward and outward MFPT profiles were obtained by reversing the milestone indices when constructing the rate matrix.

## Milestoning MD simulation setup

A total of 53 Voronoi cells were evenly distributed 2 Å apart along the  $z$  axis. The AMBER18 CUDA version currently does not support Cartesian coordinates as a collective variable. Thus, we pinned two water molecules using high Cartesian restraint of 6000 kcal mol<sup>-1</sup> Å<sup>-2</sup> force constant in the top and bottom bulk regions (20 Å away from the intracellular entrance and 35 Å away from the extracellular entrance of the channel). We then used the projected distance on the  $z$  vector between the nearest pinned water oxygen and center of mass of cAMP to define the Voronoi cells along the  $z$  axis. A cylindrical restraint with a radius of 30 Å and force constant 1 kcal mol<sup>-1</sup> Å<sup>-2</sup> was applied to cAMP to confine the sampling in the bulk region. To prevent protein drifting, a harmonic distance restraint with force constant 2000 kcal mol<sup>-1</sup> Å<sup>-2</sup> along  $x$ ,  $y$ , and  $z$  axes between the fixed water oxygen in intracellular bulk and the center of mass of the protein was added. The simulation protocol, nonbonded cutoff, and PME are the same as the AMBER18 protocol described above, except all milestoning simulations were run in NVT ensemble. A Langevin thermostat at 310.15 K and a friction coefficient of 1.0 ps<sup>-1</sup> was used (65). To avoid missing transition events, which would over-estimate the MFPT, all the milestoning trajectories were saved every 1 ps (timestep 0.2 fs). Confinement within the Voronoi cells was obtained using flat-harmonic restraint with force constant of 100 kcal mol<sup>-1</sup> Å<sup>-2</sup>.

## Decorrelation time versus wait time between transitions

Markovian milestoning yields exact MFPTs if the milestones are chosen such that successive transitions between them are statistically independent (41). To check this assumption for transitions between two neighboring milestones, in each cell, the velocity autocorrelation function and position autocorrelation function were computed for cAMP (Fig. S1, *a* and *b*) and compared with the average wait time of transition event between two milestones (Fig. S1 *c*). For all pairs of milestones, the  $z$  velocity decorrelation time is within few tens of fs and the  $z$  position decorrelation time is between 5 and 348 ps. In contrast, the average wait time for transition between milestones ranges from 1.5 to 233 ns, except for cell 19, which has a wait time of

470 ns, corresponding to the major cAMP-binding site (see Results). Therefore, in our milestoning setup, the decorrelation time is much smaller than the wait time of transition between two milestones.

## Convergence of PMF and MFPT from milestoning

Running independent simulations in the many Voronoi cells allows focused sampling on the cells with slow convergence. For PMF, the convergence of  $\pi_i$  (Eq. 1) was monitored on the fly by plotting the accumulated rate of attempted escape on both sides of the cell  $B_i$ , called  $k_{i \rightarrow j}$  and  $k_{i \rightarrow k}$ , as well as the retention rate inside each cell  $B_i$  over time (Fig. S2 *a*). The convergence of MFPT can be monitored directly from the accumulated  $n_{ij,ik}^i$  and  $r_{ij}^i$  (Fig. S2 *b*). The final 10 ns windowed relative root mean-square deviation (RMSD) (given at the top of each panel) can serve as a measure of the degree of convergence for the corresponding rate matrix entry components. RMSD within 5% (averaged over all replicas) was used as convergence criteria for all Voronoi cells (in most cases, RMSD is below 2% of the mean value). The convergence plots of all 53 cells are available on Github <https://github.com/LynaLuo-Lab/Connexin-cAMP-milestoning>. By monitoring the convergence plots on the fly, our code allows users to employ trajectories of arbitrary length and number of replicas within milestoning cells to improve sampling. Based on our convergence criteria, the sampling time in each cell ranges from 20 ns to 2 μs (Fig. S2 *c*), which yields a total 16.5 μs of multi-replica milestoning. The confidence intervals of the PMF and MFPTs were computed by sampling  $k_{ij}$ ,  $n_{ij,ik}^i$  and  $r_{ij}^i$  using Markov chain Monte Carlo procedure (43,66).

## RESULTS

### cAMP flux and single-channel permeability from voltage simulations

The single-channel permeability for cAMP was computed from inward/outward flux rates under voltages and symmetric cAMP concentrations using a previously validated open pore of Cx26 hemichannel model (28,29). To obtain a sufficient number of transition events and ensure unidirectional flux, we applied ±200 mV transmembrane potentials. Based on the number of water molecules in the simulated system, one cAMP corresponds to ~1 mM concentration (physiological concentration is in low μM range). To increase the probability of cAMP diffusing to the pore, 27 cAMP molecules were included in the system, corresponding to 26.5 mM (Table S2). Using  $z < |50|$  Å as boundaries of the hemichannel (center of mass of protein is at  $z = 0$  Å), nine single-molecule transitions were observed at +200 mV and 12 transitions at -200 mV during each 2 μs simulation (Fig. 1; Table 1; raw data in Table S3). All transitions were in the same direction at each voltage. The confidence interval for the average transition time ( $\langle t \rangle$ ) of cAMP was obtained by fitting the transition times to an exponential distribution. Based on maximum likelihood estimation,  $\langle t \rangle$  is 448 ns at +200 mV with 95% confidence interval (CI<sub>95</sub>) of 204–1646 ns, and 510 ns (CI<sub>95</sub>, 249–1571 ns) at -200 mV. The average time between consecutive transition events ( $\tau = \text{length of simulation} \div \text{number of transitions}$ ) is 222 ns at +200 mV and 166 ns at -200 mV. Given the confidence intervals, there is no significant difference in the flux in each direction. The ratio  $\langle t \rangle / \tau$  is 2.0 and 3.1, for +200 and -200 mV, respectively, which indicates there are on average two to three cAMP molecules in the channel

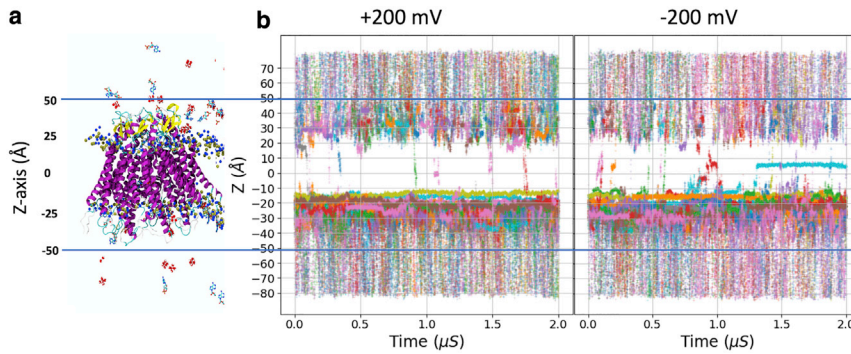

**FIGURE 1** Simulations of cAMP permeation through Cx26 hemichannel at  $\pm 200$  mV membrane potential. (a) Snapshot of the simulated system. Protein backbone is shown in cartoon mode and colored by the secondary structure (helix in magenta,  $\beta$ -sheet in yellow, loop in cyan). cAMP molecules are shown in licorice with atom color code (red, oxygen; cyan, carbon; blue, nitrogen; yellow, phosphorus). Lipids, ions, and water molecules are not shown. (b) The  $z$  coordinates of all 27 cAMP molecules during the simulations are shown in different colors. Note that the flux of cAMP is in the direction opposite to the field; thus, cAMP flux is inward (down in this figure) under  $+200$  mV and outward under  $-200$  mV. Data are summarized in Table 1. To see this figure in color, go online.

at any given time at each voltage. Inspection of the trajectories shows that this is only due exclusively to the binding of multiple cAMP molecules at the intracellular entrance (Figs. 2 and 3).

Quantitative experimental measurements of the flux of cAMP through Cx26 channels in cells are very complex and subject to a variety of potential confounding factors (8). Although there is no transition rate reported for hemichannels, two studies, which used different indirect strategies to report cAMP flux through junctional channels in the absence of junctional voltage, yielded estimates of cAMP permeability of  $6.2 \times 10^{-3}$  and  $47 \times 10^{-3} \mu\text{m}^3 \text{s}^{-1}$ , respectively (32,33). Under symmetric concentration and voltage, the current ( $I$ ) and the permeability ( $P$ ) can be related by the Goldman-Hodgkin-Katz current equation,  $I = Pz^2 \frac{V_m F^2}{RT} [c]$ , where  $z$  is the charge of cAMP ( $-1e$ ),  $V_m$  is the voltage,  $F$  is the Faraday constant,  $R$  is the gas constant,  $T$  is the absolute temperature, and  $[c]$  is the concentration of cAMP. If we use the average of inward and outward transition times (479 ns) under  $\pm 200$  mV, the current is  $3.3 \times 10^{-13} \text{ C s}^{-1}$ . Thus, the single-channel permeability ( $P$ ) of cAMP crossing an open Cx26 junctional channel at 310.15 K obtained from our voltage simulations is  $16.58 \times 10^{-3} \mu\text{m}^3 \text{s}^{-1}$ , which is in between the two experimentally measured values.

An experimental cAMP/ $\text{K}^+$  permeability ratio of 0.027 was previously reported using simultaneous measurements

of Cx26 junctional conductance and reporter-based intercellular transfer of cAMP (33). We calculated  $\text{K}^+$  transition time in presence of 27 cAMP is  $13.1 \pm 13.0$  ns at  $+200$  mV and  $6.8 \pm 7.8$  ns at  $-200$  mV. If we approximate the time needed to cross the junctional channel (two hemichannels docked at the extracellular ends) is the sum of the transition time in two opposite directions, we obtain a cAMP/ $\text{K}^+$  ratio of 0.021, reasonably close to the experimental ratio of 0.027.

### Pore cAMP density and binding sites from voltage simulations

Once the accumulated cAMP density along the channel from voltage simulations reaches the steady state, it can provide an estimate of the locations of energetic barriers and binding sites. We first plotted the charge densities of protein, lipids, total ions, and individual ions ( $\text{K}^+$ ,  $\text{Cl}^-$ , cAMP,  $\text{Mg}^{2+}$ ) along the channel  $z$  axis (Fig. 2 a). It can be seen that the channel is largely positive at intracellular entrance where the highest density of  $\text{Cl}^-$  and cAMP anions are located. The increased density of cAMP at the intracellular entrance can be seen in Fig. 1 and in the three-dimensional (3D) density of cAMP inside the channel in Fig. 2 b. A smooth indicator of cAMP distribution is shown using Boltzmann inversion ( $-kT \ln(\rho)$ ) of the cAMP density; we will call these log-density plots. Fig. 2 c shows the two-dimensional (2D) cAMP log-density along the  $z$  axis and the lateral distance from center of channel lumen ( $R$ ). Fig. 2 d is the one-dimensional (1D) cAMP log-density along the  $z$  axis. Note that these log-density profiles are acquired from nonequilibrium simulations under the influence of voltage, hence do not represent equilibrium free energy profiles. The symmetric cAMP density in the bulk regions on each side of the channel is the result of the periodic boundary condition used for MD simulations. We will derive the PMFs under voltages using the equilibrium PMF from the milestoning simulation (Fig. 5).

The 1D cAMP log-density profiles (Fig. 2 d) have a broad minimum at the intracellular entrance of the channel and a

**TABLE 1** Transition time of cAMP through Cx26 hemichannel under voltage

|                                                        | +200 mV           | -200 mV           |
|--------------------------------------------------------|-------------------|-------------------|
| cAMP flux direction                                    | Inward            | outward           |
| Transition events in 2 $\mu\text{s}$                   | 9                 | 12                |
| Events per $\mu\text{s}$                               | 4.5               | 6.0               |
| Time between transition events                         | 222 ns            | 166 ns            |
| Mean transition time ( $\text{CI}_{95}$ ) <sup>a</sup> | 448 ns (204–1646) | 510 ns (249–1571) |
| Mean dwell time ( $\text{CI}_{95}$ )                   | 305 ns (149–940)  | 398 ns (205–1086) |
| Mean barrier crossing time ( $\text{CI}_{95}$ )        | 143 ns (79–330)   | 106 ns (54–290)   |

<sup>a</sup>Sample mean and  $\text{CI}_{95}$  values are based on maximum likelihood estimate by fitting the exponential distributions (see Code availability).

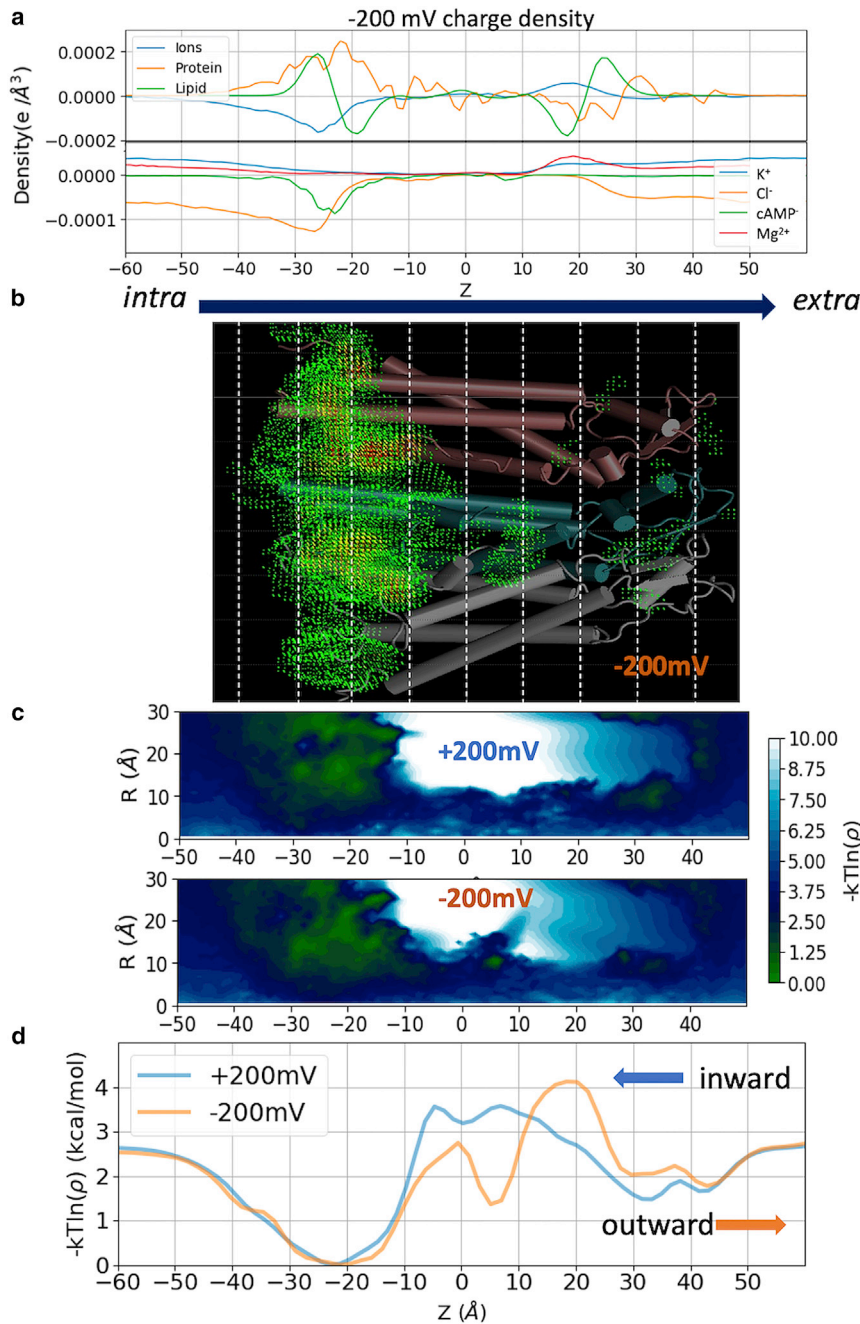

**FIGURE 2** Charge density and cAMP mass density profiles from voltage simulations. (a) Charge density of protein, lipids, total ions, and individual charged groups ( $K^+$ ,  $Cl^-$ ,  $cAMP^-$ ,  $Mg^{2+}$ ) along the channel  $z$  axis from the  $-200$  mV simulation. (b) Volumetric mass density of cAMP from  $-200$  mV simulation. Density higher than bulk is shown (green to red color representing low to high). (c) Boltzmann inversion of the cAMP 2D-density (log-density) along the channel  $z$  axis and radial distance  $R = \sqrt{(x_{cAMP})^2 + (y_{cAMP})^2}$  from channel center axis ( $x, y = 0, 0$ ). (d) 1D log-density of the cAMP within the pore along  $z$  axis. Arrows indicate the direction of cAMP flux at each voltage. Note that a log-density profile is not a PMF (see PMFs under voltage in Fig. 5). To see this figure in color, go online.

major peak in the middle of the channel. The shapes of the global minimal region are essentially identical under both voltages. There is a second well in the  $-200$  mV density that appears to bisect the central peak (discussed below). The dwell times of cAMP (Table 1) at the broad minimum ( $-50 < z < 10 \text{ \AA}$ ) are quite large under both voltages: 305 ns at  $+200$  mV, and 398 ns at  $-200$  mV (Table 1). In contrast, the rest of the channel region ( $-10 < z < 50 \text{ \AA}$ ), which contains the major barriers, was crossed by cAMP more rapidly: 143 ns for inward flux (at  $+200$  mV), and 106 ns for outward flux (at  $-200$  mV).

The cAMP-binding site ( $-50 < z < -10 \text{ \AA}$ ) present at both voltages is located in the C-terminal regions of the second transmembrane helix (TM2) and the N-terminal helix (NTH). Contact frequency analysis between cAMPs and protein sidechains indicates that cAMP bind to R99/104 and K103 on TM2 over 70% of the simulated time, and bind to K102 and R98 on TM2, and K15 on NTH over 30% of the time (Fig. 3 a). Further investigation reveals that the cAMP forms clusters between  $-30 < z < 0 \text{ \AA}$ , but almost no clusters are found in the rest of the channel (Fig. 3 b). Most of the clusters contain 2 cAMPs, which interact through  $\pi$ -stacking of

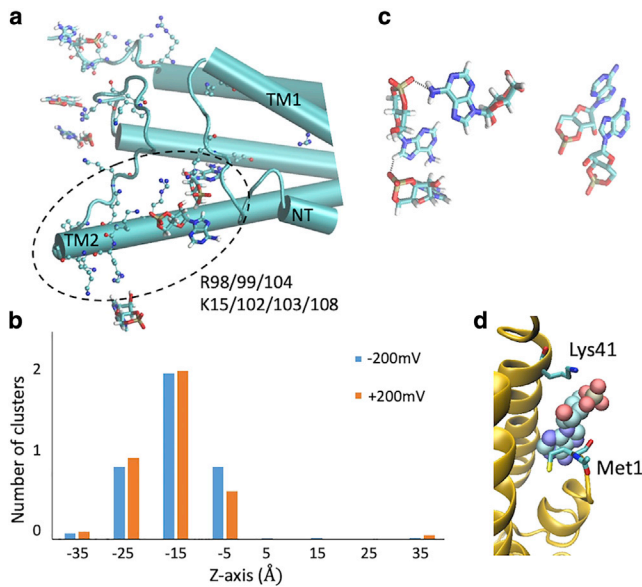

**FIGURE 3** cAMP-cAMP interactions and cAMP-channel interactions. (a) Snapshot showing cAMP molecules (in licorice mode) near positively charged residues (in CPK mode) at the intracellular entrance, corresponding to the high density in Fig. 2 b. Protein is in cartoon mode. (b) Number of cAMP clusters in each 10 Å window along the channel  $z$  axis during  $\pm 200$  mV simulations. A cluster is defined as at least two cAMP molecules with centers of mass within 20 Å at any time during the simulations. (c) Snapshots of two cAMPs clustered via  $\pi$ -stacking and three cAMPs clustered via hydrogen bonds. (d) Snapshot showing one cAMP trapped between Lys41 and Met1 under  $-200$  mV simulation, corresponding to the blue trace in Fig. 1 b. To see this figure in color, go online.

adenosine rings. Clusters of three cAMPs forming hydrogen bonds with each other also exist (Fig. 3 c). These clusters are not seen in the bulk. It appears that the positively charged residues at the intracellular entrance of the pore facilitate cAMP clustering by reducing the translational and rotational entropy of the molecules.

To check whether this cAMP clustering produces a “crowding” effect at the entrance of the pore, we compared the radius of the unoccupied lumen with and without cAMP molecules (Fig. S3 a). The minimal radius between  $-35 < z < -15$  Å suggests that the presence of multiple cAMPs blocks the pore very transiently, so has little effect on the average and standard deviation values of the available cross-sectional area at the pore entrance (radius  $> 8$  Å). In addition, the peaks in the two log-density profiles (Fig. 2 d) do not closely correlate with the narrow regions of the pore (see Figs. 8 a and S3 a for radius measurements using two different methods), indicating that steric hindrance is not a major contributor to the cAMP transition barrier. This is also consistent with the number of water molecules in the cAMP solvation shell decreasing slightly only at the intracellular binding site but remains intact throughout the narrow pore region (Fig. S3 b).

During one of the 12 permeation events at  $-200$  mV simulation, one cAMP was trapped between Met1 in the

NTH and Lys41 on the first transmembrane helix (TM1) (Figs. 1 b and 3 d). This was reflected in the log-density profile as a large dip in the bisected peak at  $z = 5$  Å (Fig. 2 d). Both NTH and Lys41 have been suggested to be involved in voltage-sensing in Cx26 (67,68). This raised the question of whether the single instance of a long residency of a cAMP molecule at this position at  $-200$  mV, but not at  $+200$  or  $0$  mV (from milestoning PMF below) is a consequence of voltage-driven repositioning of these charged moieties. To evaluate their responses to the electric field, we plotted the orientation angles between the  $z$  axis and the principal vector of Lys41 or NTH (residues 1–11) on each channel subunit (Fig. S4, a and b). Except for a reduction in Lys41 fluctuation in subunit 5, where the cAMP was trapped, there is no clear preference in the orientation of the Lys41 or NTH in response to the two opposite voltages. Of course, this result does not indicate that the NTH and Lys41 are uninvolved in voltage-sensing, only that they did not respond to  $\pm 200$  mV within the  $2$ - $\mu$ s simulations. Below we show that this binding site ( $z = 5$  Å) occurred under negative voltage is not due to protein conformational change in response to voltage, but the result of the PMF under voltage (Fig. 5).

### Free energy profiles of cAMP permeation using Markovian milestoning

The two voltage simulations above resulted in similar cAMP density profiles and similar ranges of flux rates. However, the small number of stochastic events (21 in total) led to the large uncertainty in the transition rate. In contrast to a long trajectory exploring the whole channel, multiple MD simulations confined in intervals partitioning the space can offer sufficient statistics within a shorter running time. Here, Voronoi-tessellated Markovian milestoning on a tessellation along the  $z$  coordinate of the center of mass of a single cAMP is used to estimate the PMF and the MFPT of permeation through the channel at zero membrane voltage (see Materials and methods and Code availability).

Fig. 4 shows the 1D PMF (in red) obtained from the equilibrium probability of finding cAMP in each milestoning cell. This PMF of a single cAMP permeating without applied voltage shares key common features with the log-density plots from the voltage simulations (an intracellular binding site and a free energy barrier spans between  $-20 < z < 30$  Å). The height of the barrier relative to bulk (1.2 kcal/mol) is between those seen at  $-200$  mV (1.8 kcal/mol) and  $+200$  mV (0.8 kcal/mol). However, the binding wells ( $z \approx -20$  Å) from voltage simulations are wider and deeper ( $-2.8$  kcal/mol) than the well in the PMF ( $-2$  kcal/mol), likely due to the cAMP clustering that is absent in the single cAMP milestoning.

Like the voltage simulations, milestoning simulation without voltage reveals two binding sites for cAMP, a major

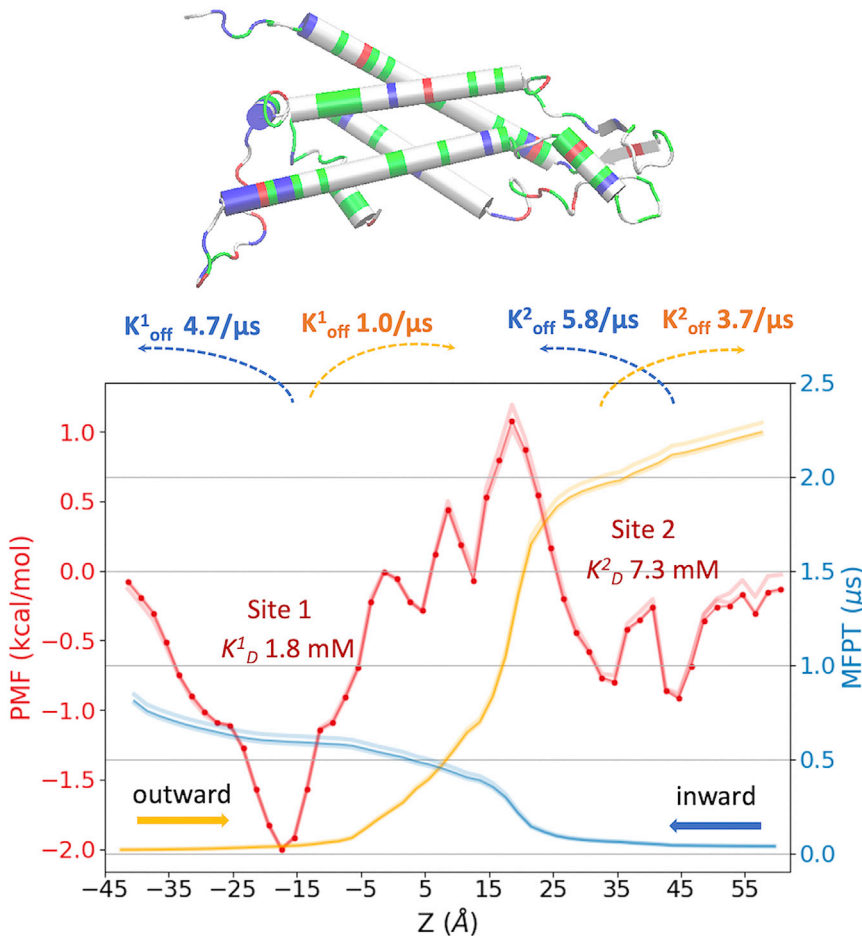

FIGURE 4 Free energy and kinetics of a single cAMP permeation through Cx26 hemichannel from milestoning simulation ( $V = 0$  mV). PMF in red, inward MFPTs in blue, and outward MFPTs in orange. The  $CI_{95}$  confidence intervals are represented by shaded colors (see [Materials and methods](#)). Binding constants and dissociation rates derived from PMF and MFPT profiles are indicated. The graphic at the top shows the backbone of one Cx26 subunit with  $z$  positions aligned with the plot below (basic residues in blue, acidic in red, polar in green, and nonpolar in white). To see this figure in color, go online.

one (site 1) near the intracellular entrance between NT and TM2 and a (bisected) much smaller one (site 2) at the extracellular loop (E1) region (Fig. 4). The single cAMP dissociation constant,  $K_D$ , can be estimated from the single cAMP equilibrium PMF using Eq. 3 (69):

$$1/K_D = \pi R^2 \int_{z_1}^{z_2} dz e^{-W(z)/k_B T}. \quad (3)$$

$W(z)$  is the PMF with bulk as reference.  $R$  is the radius of a cylindrical restraint (30 Å). Integrals over individual energy wells indicate that cAMP binds to the intracellular site (binding site 1:  $-43.4 < z < 18.6$  Å) with  $K_D$  of 1.8 mM and to the extracellular site (binding site 2:  $18.6 < z < 60.6$  Å) with  $K_D$  of 7.3 mM (Fig. 4). The integral over the entire PMF yields a total  $K_D$  of 1.4 mM for the entire channel. Thus, at the bulk cAMP concentration of the voltage simulations (26.5 mM), both binding sites are likely highly occupied, whereas at the concentration equivalent to the single cAMP used in milestoning (1 mM), none of the binding sites would be occupied more than 50%.

### Kinetics of cAMP permeation and binding using Markovian milestoning

The inward and outward MFPT profiles inside the channel (Fig. 4, blue and orange) suggest that it takes  $\sim 0.81 \mu s$  ( $CI_{95}$ , 0.80–0.82  $\mu s$ ) for the inward transition and 2.23  $\mu s$  ( $CI_{95}$ , 2.22–2.25  $\mu s$ ) for the outward transition. The faster inward than outward transition time inside the channel is consistent with the asymmetric PMF, which shows a maximum of 3.2 kcal/mol barrier for outward flux, which takes 1.0  $\mu s$  to cross, whereas the two smaller barriers of 2.0 kcal/mol for inward flux only take 212 ns (site 1) and 145 ns (site 2) to cross. It should be noted that the MFPT profiles obtained here only describe the kinetics of diffusion, binding/unbinding and barrier crossing of a single cAMP inside the pore and a limited solvent region close to the entrances, hence do not include the exchange rate with bulk. The full kinetics and flux at finite bulk concentrations of the permeant also depend on bulk diffusivity and concentration, and the diameters of the entrance at each end of the pore. For instance, diffusion current to a disk-like adsorber is  $I = 4DRC$ , where  $C$  is the permeant concentration in the infinite bulk,  $D$  is bulk diffusion constant, and  $R$  is the radius



of the disk-shaped absorber (70). For Cx26 hemichannel, the intracellular entrance (radius  $R = 25 \text{ \AA}$ ) is larger than the extracellular entrance ( $R = 10 \text{ \AA}$ ) (see pore radius in Fig. 8 a). Considering the effective radius of cAMP as  $r = 3.75 \text{ \AA}$  (calculated from the maximal solvation shell distance minus the effective radius of water, see Fig. S3 b), the effective pore radii are 21.25 and 6.25  $\text{\AA}$  for the intracellular and extracellular pore entrances, respectively, indicating that it is  $\sim 3.4$ -fold more likely for cAMP to reach the pore by random diffusion from bulk to the intracellular than the extracellular side. This consideration, along with the calculated MFPTs, yields approximately equal fluxes in each direction in the absence of a cAMP concentration gradient.

Based on the locations of the binding sites identified by the PMF, we can use MFPT profiles to estimate the time needed for a single cAMP to exit each binding site (i.e., dissociation rate  $k_{\text{off}}$ ). For outward transition,  $k_{\text{off}}^1$  for binding site 1 is  $1.0 \mu\text{s}^{-1}$  ( $-17.4 < z < 18.6$ ) and  $k_{\text{off}}^2$  for binding site 2 is  $3.7 \mu\text{s}^{-1}$  ( $32.6 < z < 60.6$ ). For inward permeation,  $k_{\text{off}}^1$  is  $4.7 \mu\text{s}^{-1}$  ( $-41.4 < z < -17.4$ ) and  $k_{\text{off}}^2$  is  $5.8 \mu\text{s}^{-1}$  ( $18.6 < z < 42.6$ ) (Fig. 4). Together with the equilibrium constant  $K_D$  from the PMF, one can estimate the association rate  $k_{\text{on}}^1$  of  $0.6 \mu\text{s}^{-1} \text{ mM}^{-1}$  and  $k_{\text{on}}^2$  of  $0.5 \mu\text{s}^{-1} \text{ mM}^{-1}$  for outward permeation, and  $k_{\text{on}}^1$  of  $2.6 \mu\text{s}^{-1} \text{ mM}^{-1}$  and  $k_{\text{on}}^2$  of  $0.8 \mu\text{s}^{-1} \text{ mM}^{-1}$  for inward permeation.

The relation between single-channel permeability ( $P$ ) and MFPT has been derived as  $P = \frac{\int_{-1}^2 dz e^{-W(z)/k_B T}}{2 \times \text{MFPT}}$  (71). If we take the average MFPT ( $1.5 \mu\text{s}$ ) inside the hemichannel from both directions, and the average effective pore radius 13.75  $\text{\AA}$ , the permeability of cAMP is  $75.5 \times 10^{-3} \mu\text{m}^3 \text{ s}^{-1}$ . Although the bulk exchange rate is not included, the permeability estimated from PMF and MFPT is within an order of magnitude of the values computed from nonequilibrium simulation and the experiments. Note that the PMF and MFPT obtained for a hemichannel cannot be presumed to exactly correspond to those for each hemichannel within a junctional channel. An adjacent hemichannel will have an impact upon the electrostatics and fluid dynamics at the extracellular junctional point. However, our hemichannel PMF and MFPT indicate that the rate-limiting region is the major binding site at the intracellular end of the pore, thus the impact of the junctional point on the binding/unbinding kinetics of cAMP inside the junctional Cx26 channel may be minimal.

### Voltage effect on asymmetric permeation free energy

The 1D log-density plots in Fig. 2 d are not the true PMFs of cAMP under two voltages. They were obtained from the steady-state density during voltage simulations. The symmetric density in the bulk regions on each side of the chan-

nel is the result of the periodic boundary condition used for MD simulations. However, the total PMF under voltage should not be symmetric. It has been shown previously that the total PMF under voltage  $W_{\text{tot}}(z)$  can be computed as the sum of the intrinsic PMF in the absence of external field  $W_{\text{eq}}(z)$  (in this case the equilibrium PMF derived from milestoneing), and the additional potential introduced by the external field  $q\delta\phi(z)$  (Eq. 4; (72–74)). This additional potential has two components. One is the constant electric field throughout the entire simulated periodic cell  $E = V(z)/L_z$ , where  $V(z)$  is the voltage linear to  $L_z$ , the length of the box in the  $z$  direction. The other component is the reaction potential due to the voltage-induced changes of the spatial distribution and orientation of the water dipole and mobile ions, as well as flexible and charged atoms in the protein and membrane (75). This approach presumes that the channel and the permeant do not undergo substantial conformational changes due to the external field within the time of simulation ( $2 \mu\text{s}$  in this case). This assumption is supported by our results from  $\pm 200 \text{ mV}$  simulations showing highly similar cAMP density distribution (Fig. 2) and pore radius profile (Fig. S3 a).

$$W_{\text{tot}}(z) = W_{\text{eq}}(z) + q\delta\phi(z) = W_{\text{eq}}(z) + q(V(z) + \phi_v(z) - \phi_0(z)). \quad (4)$$

The reaction potential introduced by external field may be approximated by the difference in electrostatic potential in presence and absence of the external potential,  $\phi_v(z) - \phi_0(z)$ . To calculate this difference in electrostatic potential, three additional 100 ns simulations at  $-200, 0$ , and  $+200 \text{ mV}$  were carried out for the same system but without cAMP. Fig. 5, a and b show the 1D potential along the central pore  $z$  axis without voltage (in blue) and under  $\pm 200 \text{ mV}$  (in orange).

Cx26 is largely positive in the intracellular side ( $-40 < z < 0 \text{ \AA}$ ), negative near the extracellular side ( $15 < z < 25 \text{ \AA}$ ), and slightly positive near extracellular entrance ( $25 < z < 35 \text{ \AA}$ ) (Fig. 2 a and reflected in Fig. 5, a and b, blue lines); thus, it has an overall dipole vector pointing toward the negative  $z$  direction. Consequently, within the protein-membrane region, positive voltage produces a potential  $\phi_v(z)$  that enhances the protein dipole, whereas the one from negative voltage counters the protein dipole (Fig. 5, a and b, orange lines). In the bulk region and lipid headgroup region ( $z > |15| \text{ \AA}$ ), the  $\phi_v(z)$  nearly cancels out the external field  $V(z)$ . The sharp drop of the  $\phi_v(z)$  under  $+200 \text{ mV}$  can be visualized on 2D-electrostatic potential maps of the whole system (Fig. 6 a), and the 3D-electrostatic potential overlaid onto the solvent mass density isosurface (Fig. 6 b) or onto the cAMP density isosurface (Fig. 6 c).

Fig. 5, c and d shows the total PMF under each voltage  $W_{\text{tot}}(z)$  obtained from Eq. 4. Clearly,  $+200 \text{ mV}$  facilitates the inward flux of the negatively charged cAMP by increasing the free energy on the extracellular side of the

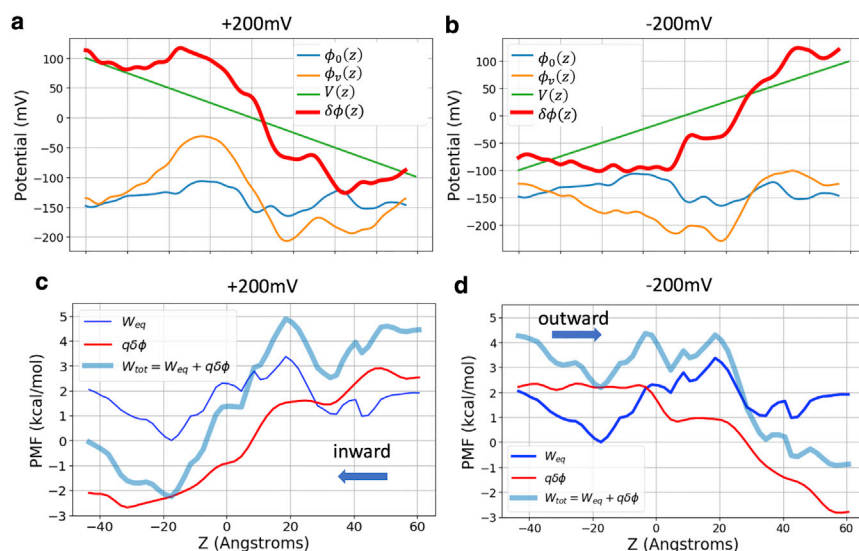

FIGURE 5 Electrostatic potentials and PMFs under voltages. (a and b) Applied potential in green ( $\pm 200$  mV) and the electrostatic potential under voltage  $\phi_v(z)$  in orange, and without voltage  $\phi_0(z)$  in blue. The sum of applied potential and reaction potential (see Eq. 4) is shown in red. (c and d) Total PMF under a constant electric field (thick blue line) computed using Eq. 4. The intrinsic PMF in absence of an electric field (thin blue line) is obtained from milestoning, and the additional electrostatic potential energy introduced by the applied field (red line) is computed from (a and b). To see this figure in color, go online.

protein ( $z > 0$ ) and decreasing the free energy on the intracellular side ( $z < 0$ ). The two inward flux energy barriers remain similar to those of the intrinsic PMF ( $\sim 2.3$  kcal/mol). However, the outward  $W_{tot}(z)$  at  $-200$  mV significantly reduced the outward barrier from 3.2 kcal/mol of the intrinsic PMF to 2.3 kcal/mol. This is consistent with the shorter barrier crossing time under  $-200$  mV (106 ns) than under  $+200$  mV (143 ns) observed above, despite the large confidence interval (Table 1). In addition, due to the interplay between the external voltage and intrinsic PMF, the binding site around  $z = 5$  Å shows up in the  $-200$  mV PMF but is entirely absent in the  $+200$  mV PMF, consistent with the difference in the cAMP density profiles obtained from voltage simulations above.

### Rotating cAMP dipole during permeation with or without voltage

cAMP is a fairly rigid molecule with a shape of an irregular prolate spheroid and a dipole moment of 37.1 Debye. Fig. 7 a shows the probability distribution of the angle between the cAMP dipole vector and the  $z$  axis from milestoning simulations. Strikingly, the cAMP molecule rotates nearly  $180^\circ$  five times on its way through the pore ( $-40$  to  $-20$ ,  $-20$  to  $0$ ,  $0$ – $10$ ,  $10$ – $20$ , and  $20$ – $40$  Å along the  $z$  axis, also see Video S1). To understand this, the  $z$  components of the force vector acting on the cAMP from the rest of the system (protein, water, ions, lipids) are decomposed into electrostatics and vdW terms and plotted for each milestoning cell (Fig. 7 b). The reciprocal forces of electrostatics and vdW terms along the channel indicate that cAMP has close interaction with the walls of the pore lumen. The positive forces push cAMP in the positive  $z$  direction, thus facilitating outward permeation, whereas the negative force facilitates inward permeation toward the negative  $z$  direction. Fig. 7, a

and b demonstrated a clear correlation between cAMP dipole orientation and the electrostatic force vector acting on the cAMP (i.e., cAMP dipole rotates when the electrostatic force vector switches the sign). Thus, milestoning simulations captured the correct orientations of cAMP dipole induced by the local electric field along the pore lumen.

What is the cAMP dipole orientation during the voltage-induced transition? Fig. 7 c shows scatter plots of dipole vectors of permeating cAMP molecules from the two voltage simulations. Between the intracellular entrance and the major binding site ( $-40$  to  $-15$  Å), dipole angles show orientation under both voltages similar to those at zero voltage, likely because of the large magnitude of the channel local field. Although the sampling is scarce in the barrier crossing region ( $-20 < z < 20$  Å), cAMP shows a clear preference in orientation at  $z \approx 0$  and at  $z \approx 25$ – $30$  Å, adopting the opposite orientation under the two voltages. Thus, these position-dependent dipole orientations of the permeant during our voltage simulations were the results of a competition between channel's internal field and external voltage.

### Position-dependent influence of cAMP on pore radius

The presence of cAMP at different locations inside the pore may have local or nonlocal effect of the pore radius. To investigate the local effect, we first compared the mean and standard deviations of the pore radius along the length of the pore, without cAMP (Fig. 8 a, black), and the radius at the position of the cAMP (Fig. 8 a, blue). Notice that these pore radii, obtained using grid-based cavity search program *trj\_cavity* (77) ranged between 10 and 15 Å, larger than the 7.5–10.5 Å radius obtained using the Hole program (Fig. S3). This is because the Hole algorithm uses a

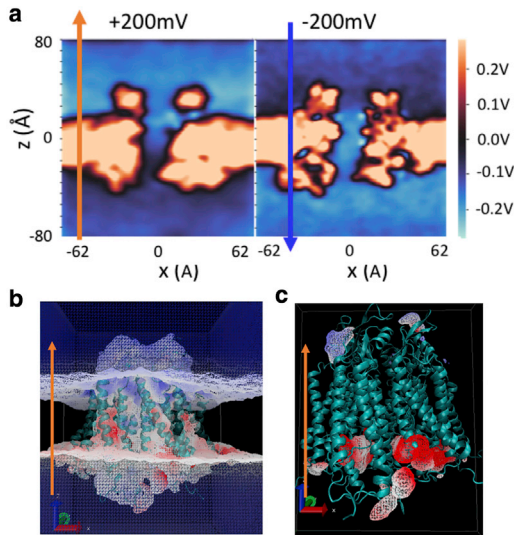

FIGURE 6 Electrostatic potential at  $\pm 200$  mV membrane potential. (a) 2D-electrostatic potential maps (vector 1,0,1 in Cartesian space). (b) The 3D-electrostatic potential at +200 mV overlaid onto the solvent mass density isosurface. The color scale is  $-12.11$  to  $32.95$   $kT/e$  ( $-323$  to  $+880$  mV) from blue to red. Only the electrostatic potential at +200 mV is shown here as the color change in  $-200$  mV is much less prominent (because of the opposite orientation of the intrinsic dipole as described in the text). (c) Electrostatic potential overlaid onto the cAMP density isosurface at +200 mV. The color scale is  $-267$  to  $+267$  mV. The isosurface contour cutoff is  $0.1$   $\text{amu}/\text{\AA}^3$  for (b and c). All data in this figure are calculated from the 3D electrostatic potential map ( $r$ ) based on all charged atoms in the simulated system by solving Poisson equation on a  $1$ - $\text{\AA}$  resolution grid using the VMD PMEpot plugin (76). PMEpot approximate point charge by a spherical Gaussian with an Ewald factor of  $0.25$ . ( $r$ ) is reported as the average of 1000 snapshots from the last 200 ns. To see this figure in color, go online.

spherical probe of increasing radius, which underestimates the space within an irregularly shaped pore. Fig. 8 a shows that the influence on pore radius depends on where cAMP resides. For instance, the radius increases when cAMP is around  $z = -10$   $\text{\AA}$  but decreases when it is around  $z = 30$   $\text{\AA}$ , near the extracellular entrance of the pore.

To investigate the nonlocal effect of cAMP on pore radius, we used Cohen  $d$  score of pore radius distributions to compare the mean radius with and without cAMP. Fig. 8 b is a heat map of Cohen  $d$  score, which depicts the changes in pore diameter along its length ( $x$  axis of Fig. 8 b) caused by the presence of cAMP at each  $z$  position ( $y$  axis of Fig. 8 b). Cohen  $d$  score was calculated using Eq. 5:

$$\text{Cohen } d(z) = \frac{\langle r'(z) \rangle - \langle r(z) \rangle}{SD_{\text{pooled}}}, \quad (5)$$

where  $\langle r(z) \rangle$  is the average pore radius without cAMP (Fig. 8 a, black) and  $\langle r'(z) \rangle$  is the average pore radius with cAMP at various locations of the pore, obtained from milestone simulation trajectories.  $SD_{\text{pooled}}$  is the pooled standard deviation of  $r'(z)$  and  $r(z)$ . For instance, a  $d$  score of  $6$  (blue) means the presence of cAMP increased the mean

pore radius by  $6SD_{\text{pooled}}$ , and a score of  $-6$  (green) means the presence of cAMP decreased the mean pore radius by  $6SD_{\text{pooled}}$ .

On the heatmap, the  $d$  score colors along the diagonal line represent changes in pore radius at the position of the cAMP, corresponding to the Fig. 8 a blue profile. The off-diagonal colors represent nonlocal changes in pore radius away from where the cAMP is in the pore. It is evident that the presence of cAMP can have effects on lumen radius distant from the position of cAMP itself. Most interestingly, the scores on the upper off diagonal are more populated by green color and lower off diagonal shows more blue color. This trend suggests that when cAMP permeates through the pore, it tends to enlarge the radius on the left side (toward intracellular) and narrow the radius on the right side (toward extracellular).

## DISCUSSION

In this work, we use both long timescale MD simulations and Voronoi-tessellated Markovian milestone to explore how a charged biological signaling molecule, cAMP, permeates a connexin open pore. We first obtained the steady-state density profile and the inward/outward cAMP flux under  $\pm 200$  mV voltages from two  $2$   $\mu\text{s}$  MD simulations in the presence of multiple cAMPs. These results were compared with the PMF and MFPT of a single cAMP at zero voltage obtained from a total  $16.5$   $\mu\text{s}$  of multiple milestone simulations. Those two computational approaches—long timescale under voltage (nonequilibrium) and milestone without voltage (equilibrium)—provided crossvalidation and complementary information that allowed detailed analysis of the kinetics of cAMP transit in the absence and presence of voltage, and in absence and presence of multiple cAMP molecules. Both  $\pm 200$  mV simulations in  $26.5$  mM cAMP and single cAMP milestone simulation featured a prominent intrapore-binding site, characterized by a high density of positive charge in a wide entrance region of the pore. The single-channel permeabilities estimated from both approaches are in qualitative agreement with known experimental data. The PMF and MFPT from milestone further allow us to estimate the  $K_D$ ,  $k_{\text{on}}$ , and  $k_{\text{off}}$  of cAMP inside the channel. Both the channel geometry and dipole contributed to the asymmetric permeation free energy and kinetics in the pore. The relation between voltage simulations and milestone simulations was further investigated by deriving the PMF under voltage from the intrinsic PMF. We show that positive voltage increases the free energy barrier by enhancing the protein dipole, whereas negative voltage reduces the free energy barrier by reducing protein dipole. In addition, unbiased simulations within each milestone cell allowed us to examine the dipole orientation of cAMP through the pore and the short-range and long-range effects of cAMP on pore width.

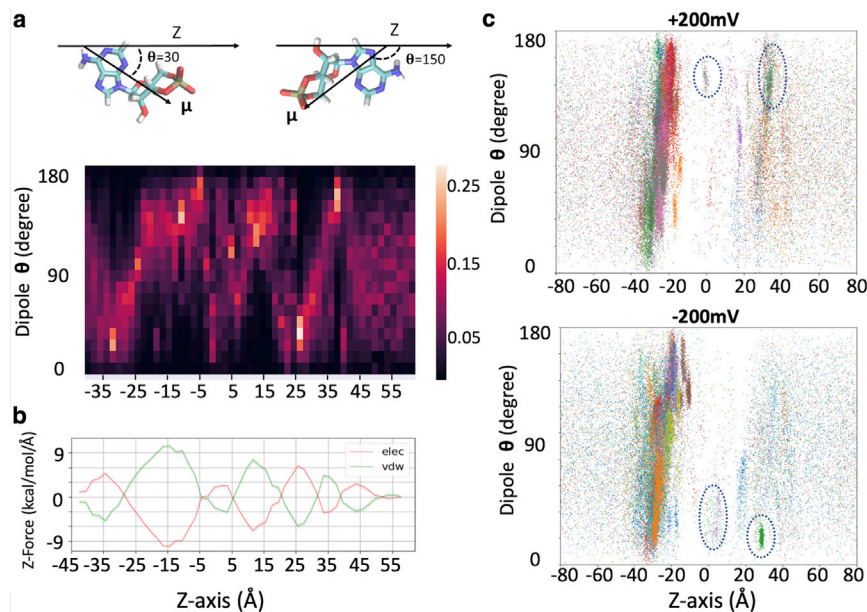

FIGURE 7 Dipole moment distribution and force decomposition for cAMP molecules along  $z$  axis (Å). (a) cAMP dipole angles are shown as a probability distribution for each milestone simulation cell along the  $z$  axis. Color bar shows the probability scale, lighter color represents higher probability. Representative dipole angles are illustrated on the cAMP molecule above. (b) Mean electrostatic and vdW forces along  $z$  axis on cAMP. Lines represent the running average of three milestone cells and shaded areas represent standard error of mean within each milestone cell. (c) Dipole angle scatterplot of permeating cAMP at  $-200$  and  $+200$  mV voltage simulations, respectively. To see this figure in color, go online.

Although our voltage simulations show that more than one cAMP can be within the pore, this multiple occupancy only occurs at the wide intracellular entrance, and that there is single cAMP occupancy in the rest of the pore. Thus, we do not anticipate for cAMP the types of multioccupancy effects seen in many ion channels that involve interactions between sequential single-occupancy binding sites in the permeation path. The self-interactions among the cAMP molecules at the pore entrance (and not in bulk) is likely because of the 26.5 mM concentration of cAMP used to obtain a measurable number of transits during the voltage simulation, which was greatly increased at the pore

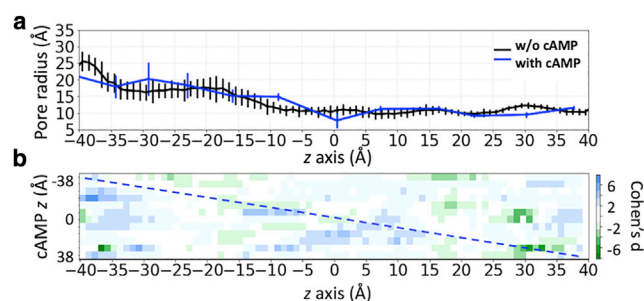

FIGURE 8 Local and nonlocal effect of cAMP on Cx26 pore radius. (a) The mean and standard deviation of Cx26 pore radius as a function of the pore axis ( $z$ ) during simulations. Black line is the pore radius without cAMP and the blue line is the radius at the position of the cAMP. (b) Cohen  $d$ -scores of pore radius distributions (see Eq. 5). The  $y$  axis indicates the  $z$  position of the cAMP, and  $x$  axis is the full-length pore axis. The dashed diagonal line indicates changes in pore radius at the position of the cAMP, whereas off-diagonal colors indicate cAMP's nonlocal effect on the pore radius. Blue color indicates cAMP increase the pore radius, and green color indicates cAMP decrease the pore radius. To see this figure in color, go online.

entrance. The cAMP self-interactions are unlikely to occur at any physiological cAMP concentrations. However, this finding does point out a caution when a high concentration of ligands is used in computations to speed up the sampling.

In current study, we included 1:1 ratio of  $Mg^{2+}$  and cAMP in all simulations. Modeling magnesium-phosphate interaction is an active area of force field development (78,79). The  $Mg(H_2O)_6^{2+}$  model used here was previously developed to reproduce the osmotic pressure of  $Mg^{2+}$ -anion solutions (52). Based on the nature of the model, we do not expect direct contact ion pairs to form between  $Mg^{2+}$ -cAMP or  $Mg^{2+}$ -protein. We did observe one solvent-separated ion pair between  $Mg^{2+}$  and the calcium-binding site (D50, D46, E47) on one subunit during  $+200$  mV simulations with dwell time  $\sim 1.5 \mu s$  (Fig. S5). However, we did not observe solvent-separated ion pairs between  $Mg^{2+}$ -cAMP during cAMP permeation or binding, nor does cAMP permeation displace  $Mg^{2+}$ . We note that when a  $Mg^{2+}$  was coordinated at the above site, there was no effect on pore width, which was wide enough to allow passage of fully hydrated cAMP. This absence of effect on pore width is consistent with the cryo-EM data of  $Ca^{2+}$  bound to this site (80). It should be noted that copermeation of  $Mg^{2+}$  with ATP will be more likely as one  $Mg^{2+}$  can be coordinated by two or three phosphate groups (79).

The analysis methods and code presented in this study can be applied to understand the molecular permeation through a large pore in general. The primary impact of this work will be to establish a way to generate meaningful hypotheses/understanding about the basis of molecular selectivity of connexin channels and to understand how mutations of connexin proteins alter the selectivity and thereby cause human pathologies.

## CODE AVAILABILITY

Input files and raw data used to generate each figure, as well as python3 scripts for multireplica milestone analysis and convergence check are publicly available at <https://github.com/LynaLuo-Lab/Connexin-cAMP-milestoning>. Long timescale MD trajectories are publicly available on Anton2 supercomputer.

## SUPPORTING MATERIAL

Supporting material can be found online at <https://doi.org/10.1016/j.bpj.2021.06.024>.

## AUTHOR CONTRIBUTIONS

W.J. prepared the system, reparameterized cAMP force field, and performed nonequilibrium simulations. Y.-C.L. performed milestone simulations. W.J. and Y.-C.L. analyzed both simulation results. W.B.-S. prepared milestone analysis scripts in python3 and performed convergence analysis. Y.L.L., W.B.-S., and L.M. supervised milestone simulation. Y.L.L., A.L.H., L.M., and J.C. designed the project and wrote the article with input from all authors.

## ACKNOWLEDGMENTS

Computational resources were provided via the Extreme Science and Engineering Discovery Environment allocation TG-MCB160119, which is supported by National Science Foundation grant number ACI-154862. Anton2 computer time was provided by the Pittsburgh Supercomputing Center through National Institutes of Health Grant R01-GM116961. The Anton2 machine at Pittsburgh Supercomputing Center was generously made available by D. E. Shaw Research.

## REFERENCES

- Fairman, J. W., N. Noinaj, and S. K. Buchanan. 2011. The structural biology of  $\beta$ -barrel membrane proteins: a summary of recent reports. *Curr. Opin. Struct. Biol.* 21:523–531.
- Michalski, K., J. L. Syrjanen, ..., T. Kawate. 2020. The Cryo-EM structure of pannexin 1 reveals unique motifs for ion selection and inhibition. *eLife*. 9:e54670.
- Gaete, P. S., and J. E. Contreras. 2020. Taking a close look at a large-pore channel. *eLife*. 9:e56114.
- Harris, A. L. 2007. Connexin channel permeability to cytoplasmic molecules. *Prog. Biophys. Mol. Biol.* 94:120–143.
- Harris, A. L. 2001. Emerging issues of connexin channels: biophysics fills the gap. *Q. Rev. Biophys.* 34:325–472.
- Pfenniger, A., A. Wohlwend, and B. R. Kwak. 2011. Mutations in connexin genes and disease. *Eur. J. Clin. Invest.* 41:103–116.
- García, I. E., P. Prado, ..., A. D. Martínez. 2016. Connexinopathies: a structural and functional glimpse. *BMC Cell Biol.* 17 (Suppl 1):17.
- Harris, A. L. 2008. Connexin specificity of second messenger permeation: real numbers at last. *J. Gen. Physiol.* 131:287–292.
- Noskov, S. Y., T. K. Rostovtseva, and S. M. Bezrukov. 2013. ATP transport through VDAC and the VDAC-tubulin complex probed by equilibrium and nonequilibrium MD simulations. *Biochemistry*. 52:9246–9256.
- Choudhary, O. P., A. Paz, ..., M. Grabe. 2014. Structure-guided simulations illuminate the mechanism of ATP transport through VDAC1. *Nat. Struct. Mol. Biol.* 21:626–632.
- van den Berg, B., S. Prathyusha Bhamidimarri, ..., M. Winterhalter. 2015. Outer-membrane translocation of bulky small molecules by passive diffusion. *Proc. Natl. Acad. Sci. USA*. 112:E2991–E2999.
- Ziervogel, B. K., and B. Roux. 2013. The binding of antibiotics in OmpF porin. *Structure*. 21:76–87.
- Parkin, J., and S. Khalid. 2014. Atomistic molecular-dynamics simulations enable prediction of the arginine permeation pathway through OccD1/OprD from *Pseudomonas aeruginosa*. *Biophys. J.* 107:1853–1861.
- Samanta, S., M. A. Scorciapino, and M. Ceccarelli. 2015. Molecular basis of substrate translocation through the outer membrane channel OprD of *Pseudomonas aeruginosa*. *Phys. Chem. Chem. Phys.* 17:23867–23876.
- Pothula, K. R., C. J. F. Solano, and U. Kleinekathofer. 2016. Simulations of outer membrane channels and their permeability. *Biochim. Biophys. Acta*. 1858:1760–1771.
- Wells, D. B., V. Abramkina, and A. Aksimentiev. 2007. Exploring transmembrane transport through alpha-hemolysin with grid-steered molecular dynamics. *J. Chem. Phys.* 127:125101.
- Di Marino, D., E. L. Bonome, ..., M. Chinappi. 2015. All-atom molecular dynamics simulation of protein translocation through an  $\alpha$ -hemolysin nanopore. *J. Phys. Chem. Lett.* 6:2963–2968.
- Di Muccio, G., A. E. Rossini, ..., M. Chinappi. 2019. Insights into protein sequencing with an alpha-Hemolysin nanopore by atomistic simulations. *Sci. Rep.* 9:6440.
- Manara, R. M. A., S. Tomasio, and S. Khalid. 2015. The nucleotide capture region of alpha hemolysin: insights into nanopore design for DNA sequencing from molecular dynamics simulations. *Nanomaterials (Basel)*. 5:144–153.
- Lindahl, V., P. Gourdon, ..., B. Hess. 2018. Permeability and ammonia selectivity in aquaporin TIP2;1: linking structure to function. *Sci. Rep.* 8:2995.
- Hénin, J., E. Tajkhorshid, ..., C. Chipot. 2008. Diffusion of glycerol through *Escherichia coli* aquaglyceroporin GlpF. *Biophys. J.* 94:832–839.
- Jensen, M. O., S. Park, ..., K. Schulten. 2002. Energetics of glycerol conduction through aquaglyceroporin GlpF. *Proc. Natl. Acad. Sci. USA*. 99:6731–6736.
- Wang, Y., J. Cohen, ..., E. Tajkhorshid. 2007. Exploring gas permeability of cellular membranes and membrane channels with molecular dynamics. *J. Struct. Biol.* 157:534–544.
- Hub, J. S., and B. L. de Groot. 2008. Mechanism of selectivity in aquaporins and aquaglyceroporins. *Proc. Natl. Acad. Sci. USA*. 105:1198–1203.
- Wu, M., L. Sun, ..., S. Zhao. 2019. Molecular mechanism of acetate transport through the acetate channel SatP. *J. Chem. Inf. Model.* 59:2374–2382.
- Luecke, H., R. McNulty, ..., J. Ulmschneider. 2014. Mechanisms of molecular transport through the proton-gated urea channel of *Helicobacter pylori*. *Biophys. J.* 106:448a.
- McNulty, R., J. P. Ulmschneider, ..., M. B. Ulmschneider. 2013. Mechanisms of molecular transport through the urea channel of *Helicobacter pylori*. *Nat. Commun.* 4:2900.
- Kwon, T., A. L. Harris, ..., T. A. Bargiello. 2011. Molecular dynamics simulations of the Cx26 hemichannel: evaluation of structural models with Brownian dynamics. *J. Gen. Physiol.* 138:475–493.
- Luo, Y., A. R. Rossi, and A. L. Harris. 2016. Computational studies of molecular permeation through connexin26 channels. *Biophys. J.* 110:584–599.
- Chandrasekhar, A., E. A. Kalmykov, ..., B. J. Nicholson. 2013. Intercellular redistribution of cAMP underlies selective suppression of cancer cell growth by connexin26. *PLoS One*. 8:e82335.

31. Chen, C. X., K. J. Luo, ..., J. X. Jiang. 2020. Connexins and cAMP cross-talk in cancer progression and metastasis. *Cancers (Basel)*. 13:E58.
32. Hernandez, V. H., M. Bortolozzi, ..., F. Mammano. 2007. Unitary permeability of gap junction channels to second messengers measured by FRET microscopy. *Nat. Methods*. 4:353–358.
33. Kanaporis, G., G. Mese, ..., V. Valiunas. 2008. Gap junction channels exhibit connexin-specific permeability to cyclic nucleotides. *J. Gen. Physiol.* 131:293–305.
34. Mullen, R. G., J. E. Shea, and B. Peters. 2014. Transmission coefficients, committers, and solvent coordinates in ion-pair dissociation. *J. Chem. Theory Comput.* 10:659–667.
35. Bowman, G. R., and V. S. Pande. 2013. *An Introduction to Markov State Models and Their Application to Long Timescale Molecular Simulation*. Springer, The Netherlands.
36. Faradjian, A. K., and R. Elber. 2004. Computing time scales from reaction coordinates by milestoning. *J. Chem. Phys.* 120:10880–10889.
37. Huber, G. A., and S. Kim. 1996. Weighted-ensemble Brownian dynamics simulations for protein association reactions. *Biophys. J.* 70:97–110.
38. Bhatt, D., B. W. Zhang, and D. M. Zuckerman. 2010. Steady-state simulations using weighted ensemble path sampling. *J. Chem. Phys.* 133:014110.
39. Zhang, B. W., D. Jasnow, and D. M. Zuckerman. 2010. The “weighted ensemble” path sampling method is statistically exact for a broad class of stochastic processes and binning procedures. *J. Chem. Phys.* 132:054107.
40. Vanden-Eijnden, E., and M. Venturoli. 2009. Markovian milestoning with Voronoi tessellations. *J. Chem. Phys.* 130:194101.
41. Vanden-Eijnden, E., M. Venturoli, ..., R. Elber. 2008. On the assumptions underlying milestoning. *J. Chem. Phys.* 129:174102.
42. Yu, T.-Q., M. Lapelosa, ..., C. F. Abrams. 2015. Full kinetics of CO entry, internal diffusion, and exit in myoglobin from transition-path theory simulations. *J. Am. Chem. Soc.* 137:3041–3050.
43. Jagger, B. R., A. A. Ojha, and R. E. Amaro. 2020. Predicting ligand binding kinetics using a Markovian milestoning with Voronoi tessellations multiscale approach. *J. Chem. Theory Comput.* 16:5348–5357.
44. Maragliano, L., E. Vanden-Eijnden, and B. Roux. 2009. Free energy and kinetics of conformational transitions from Voronoi tessellated milestoning with restraining potentials. *J. Chem. Theory Comput.* 5:2589–2594.
45. He, X., Y. Shen, ..., E. E. Santiso. 2016. Heterogeneous nucleation from a supercooled ionic liquid on a carbon surface. *J. Chem. Phys.* 145:211919.
46. Alberini, G., F. Benfenati, and L. Maragliano. 2018. Molecular dynamics simulations of ion selectivity in a claudin-15 paracellular channel. *J. Phys. Chem. B*. 122:10783–10792.
47. Cottone, G., L. Chiodo, and L. Maragliano. 2020. Thermodynamics and kinetics of ion permeation in wild-type and mutated open active conformation of the human  $\alpha 7$  nicotinic receptor. *J. Chem. Inf. Model.* 60:5045–5056.
48. MacKerell, A. D., Jr., D. Bashford, ..., M. Karplus. 1998. All-atom empirical potential for molecular modeling and dynamics studies of proteins. *J. Phys. Chem. B*. 102:3586–3616.
49. Mackerell, A. D., Jr., M. Feig, and C. L. Brooks, III. 2004. Extending the treatment of backbone energetics in protein force fields: limitations of gas-phase quantum mechanics in reproducing protein conformational distributions in molecular dynamics simulations. *J. Comput. Chem.* 25:1400–1415.
50. Klauda, J. B., R. M. Venable, ..., R. W. Pastor. 2010. Update of the CHARMM all-atom additive force field for lipids: validation on six lipid types. *J. Phys. Chem. B*. 114:7830–7843.
51. Jorgensen, W. L., J. Chandrasekhar, ..., M. L. Klein. 1983. Comparison of simple potential functions for simulating liquid water. *J. Chem. Phys.* 79:926–935.
52. Yoo, J., and A. Aksimentiev. 2012. Improved parametrization of Li<sup>+</sup>, Na<sup>+</sup>, K<sup>+</sup>, and Mg<sup>2+</sup> ions for all-atom molecular dynamics simulations of nucleic acid systems. *J. Phys. Chem. Lett.* 3:45–50.
53. Vanommeslaeghe, K., E. Hatcher, ..., A. D. Mackerell, Jr. 2010. CHARMM general force field: a force field for drug-like molecules compatible with the CHARMM all-atom additive biological force fields. *J. Comput. Chem.* 31:671–690.
54. Mayne, C. G., J. Saam, ..., J. C. Gumbart. 2013. Rapid parameterization of small molecules using the force field toolkit. *J. Comput. Chem.* 34:2757–2770.
55. Jo, S., T. Kim, and W. Im. 2007. Automated builder and database of protein/membrane complexes for molecular dynamics simulations. *PLoS One*. 2:e880.
56. Jo, S., T. Kim, ..., W. Im. 2008. CHARMM-GUI: a web-based graphical user interface for CHARMM. *J. Comput. Chem.* 29:1859–1865.
57. Khan, Ali, ..., 2021. Cryo-EM structure of an open conformation of a gap junction hemichannel in lipid bilayer nanodiscs. *Structure* <https://doi.org/10.1016/j.str.2021.05.010>.
58. Case, D. A., D. S. Cerutti, ..., P. A. Kollman. 2018. *AMBER reference manual*. University of California, San Francisco, CA.
59. Hoover, W. G., A. J. Ladd, and B. Moran. 1982. High-strain-rate plastic flow studied via nonequilibrium molecular dynamics. *Phys. Rev. Lett.* 48:1818.
60. Evans, D. J. 1983. Computer “experiment” for nonlinear thermodynamics of Couette flow. *J. Chem. Phys.* 78:3297–3302.
61. Åqvist, J., P. Wennerström, ..., B. O. Brandsdal. 2004. Molecular dynamics simulations of water and biomolecules with a Monte Carlo constant pressure algorithm. *Chem. Phys. Lett.* 384:288–294.
62. Allen, M. P., and D. J. Tildesley. 2017. *Computer Simulation of Liquids*. Oxford University Press, Oxford, UK.
63. Darden, T., D. York, and L. Pedersen. 1993. Particle mesh Ewald: an N · log(N) method for Ewald sums in large systems. *J. Chem. Phys.* 98:10089–10092.
64. Shan, Y., J. L. Klepeis, ..., D. E. Shaw. 2005. Gaussian split Ewald: a fast Ewald mesh method for molecular simulation. *J. Chem. Phys.* 122:54101.
65. Basconi, J. E., and M. R. Shirts. 2013. Effects of temperature control algorithms on transport properties and kinetics in molecular dynamics simulations. *J. Chem. Theory Comput.* 9:2887–2899.
66. Noé, F. 2008. Probability distributions of molecular observables computed from Markov models. *J. Chem. Phys.* 128:244103–244113.
67. Verselis, V. K., C. S. Ginter, and T. A. Bargiello. 1994. Opposite voltage gating polarities of two closely related connexins. *Nature*. 368:348–351.
68. Pinto, B. I., I. E. García, ..., C. González. 2016. Charged residues at the first transmembrane region contribute to the voltage dependence of the slow gate of connexins. *J. Biol. Chem.* 291:15740–15752.
69. Allen, T. W., O. S. Andersen, and B. Roux. 2004. Energetics of ion conduction through the gramicidin channel. *Proc. Natl. Acad. Sci. USA*. 101:117–122.
70. Berg, H. C. 1984. *Random Walks in Biology: New and Expanded Edition*. Princeton University Press, Princeton, NJ.
71. Votapka, L. W., C. T. Lee, and R. E. Amaro. 2016. Two relations to estimate membrane permeability using milestoning. *J. Phys. Chem. B*. 120:8606–8616.
72. Bernèche, S., and B. Roux. 2003. A microscopic view of ion conduction through the K<sup>+</sup> channel. *Proc. Natl. Acad. Sci. USA*. 100:8644–8648.
73. Roux, B. 1999. Statistical mechanical equilibrium theory of selective ion channels. *Biophys. J.* 77:139–153.
74. Roux, B. 2008. The membrane potential and its representation by a constant electric field in computer simulations. *Biophys. J.* 95:4205–4216.

75. Gumbart, J., F. Khalili-Araghi, ..., B. Roux. 2012. Constant electric field simulations of the membrane potential illustrated with simple systems. *Biochim. Biophys. Acta.* 1818:294–302.
76. Aksimentiev, A., and K. Schulten. 2005. Imaging  $\alpha$ -hemolysin with molecular dynamics: ionic conductance, osmotic permeability, and the electrostatic potential map. *Biophys. J.* 88:3745–3761.
77. Paramo, T., A. East, ..., P. J. Bond. 2014. Efficient characterization of protein cavities within molecular simulation trajectories: trj\_cavity. *J. Chem. Theory Comput.* 10:2151–2164.
78. Villa, F., A. D. MacKerell, Jr., ..., T. Simonson. 2018. Classical drude polarizable force field model for methyl phosphate and its interactions with  $Mg^{2+}$ . *J. Phys. Chem. A.* 122:6147–6155.
79. Buelens, F. P., H. Leonov, ..., H. Grubmüller. 2021. ATP-magnesium coordination: protein structure-based force field evaluation and corrections. *J. Chem. Theory Comput.* 17:1922–1930.
80. Bennett, B. C., M. D. Purdy, ..., M. Yeager. 2016. An electrostatic mechanism for  $Ca^{2+}$ -mediated regulation of gap junction channels. *Nat. Commun.* 7:8770.

**Biophysical Journal, Volume 120**

**Supplemental information**

**Free energy and kinetics of cAMP permeation through connexin26 via applied voltage and milestoning**

**Wenjuan Jiang, Yi-Chun Lin, Wesley Botello-Smith, Jorge E. Contreras, Andrew L. Harris, Luca Maragliano, and Yun Lyna Luo**



# Supporting Information

## Free energy and kinetics of cAMP permeation through connexin26 via applied voltage and milestoning

Wenjuan Jiang<sup>#1</sup>, Yi-Chun Lin<sup>#1</sup>, Wesley Botello-Smith <sup>#1</sup>, Jorge Contreras<sup>\*2</sup>, Andrew L. Harris<sup>\*3</sup>, Luca Maragliano<sup>\*4,5</sup>, Yun Lyna Luo<sup>\*1</sup>

1. Department of Pharmaceutical Sciences, College of Pharmacy, Western University of Health Sciences, 309 E. Second St, Pomona, CA, USA.
2. Department of Physiology and Membrane Biology, School of Medicine, University of California, Davis, CA, USA
3. Department of Pharmacology, Physiology, and Neuroscience. New Jersey Medical School, Rutgers, The State University of New Jersey, Newark, NJ, USA.
4. Department of Life and Environmental Sciences, Polytechnic University of Marche, Ancona, Italy
5. Center for Synaptic Neuroscience and Technology, Italian Institute of Technology, Genoa, Italy.

# contribute equally

\* corresponding authors

Running title: cAMP permeation through hemichannel

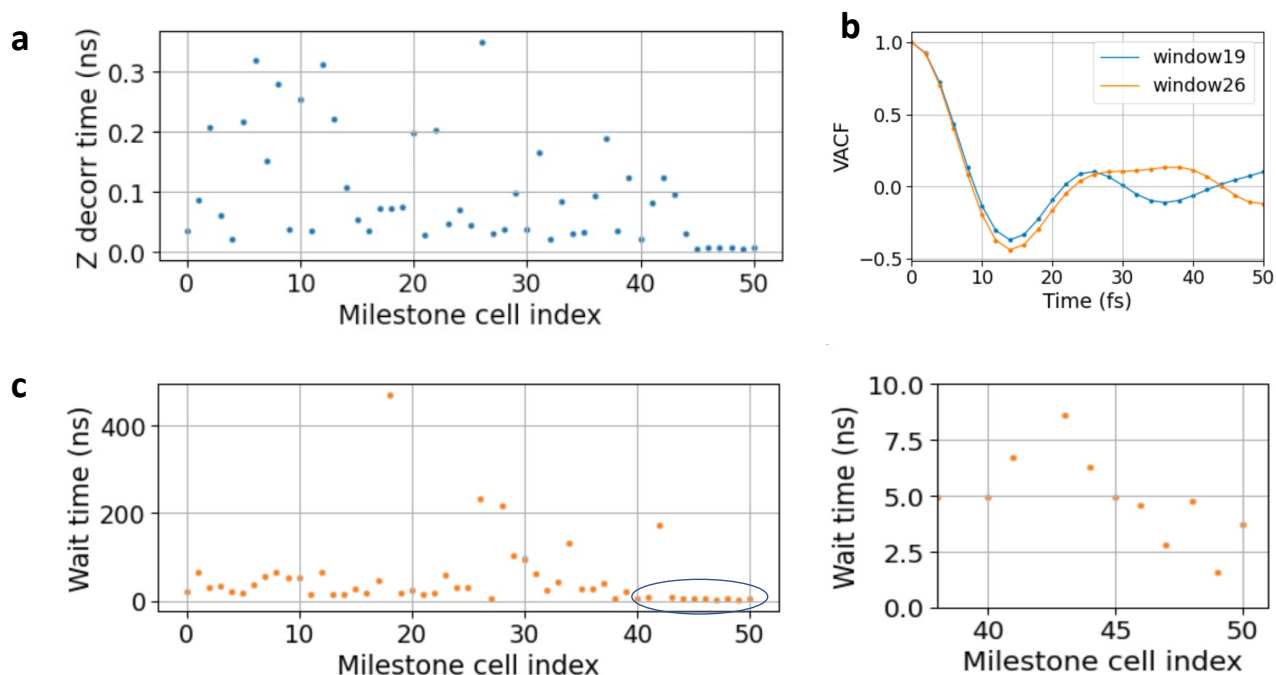

**Figure S1.** a) cAMP z-position decorrelation time in each milestone cell. b) cAMP z-velocity autocorrelation functions of window 19 (slowest position decorrelation) and window 26 (longest wait time). c) Average wait time of transition event in each milestone cell. The circled region is zoomed in on the right.

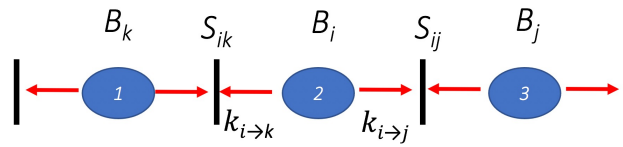

**a**

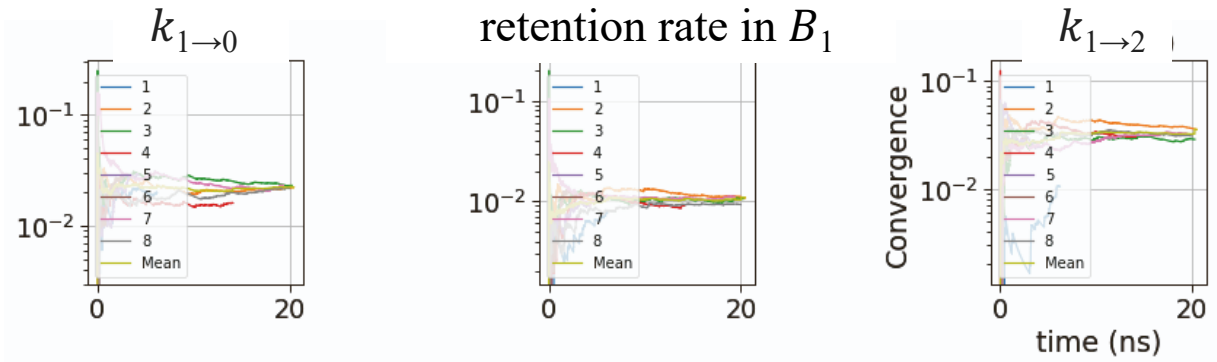

**b**

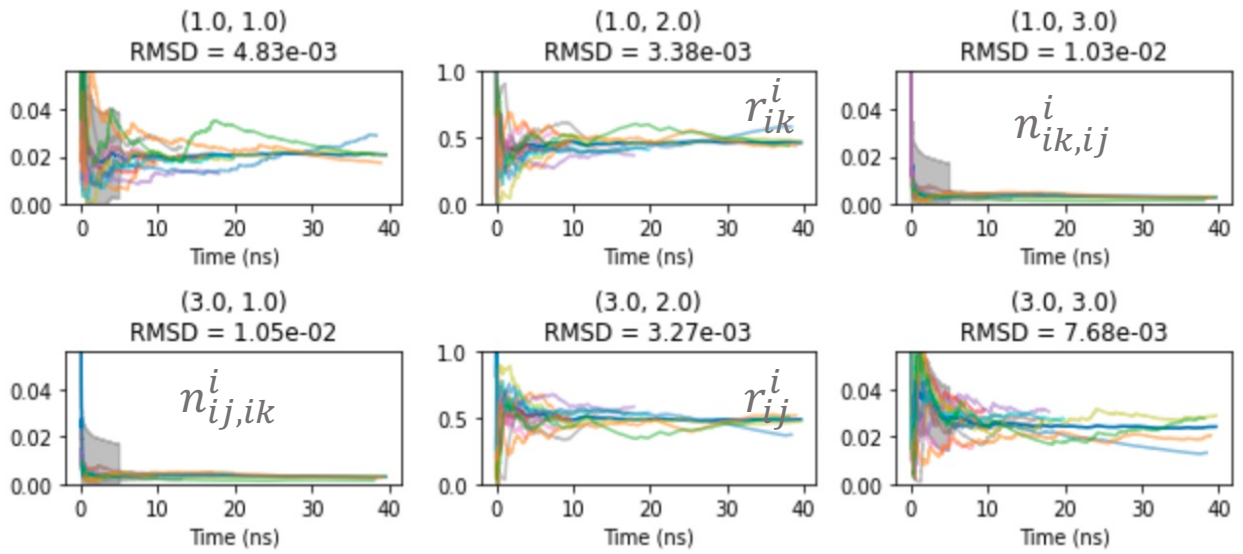

**c**

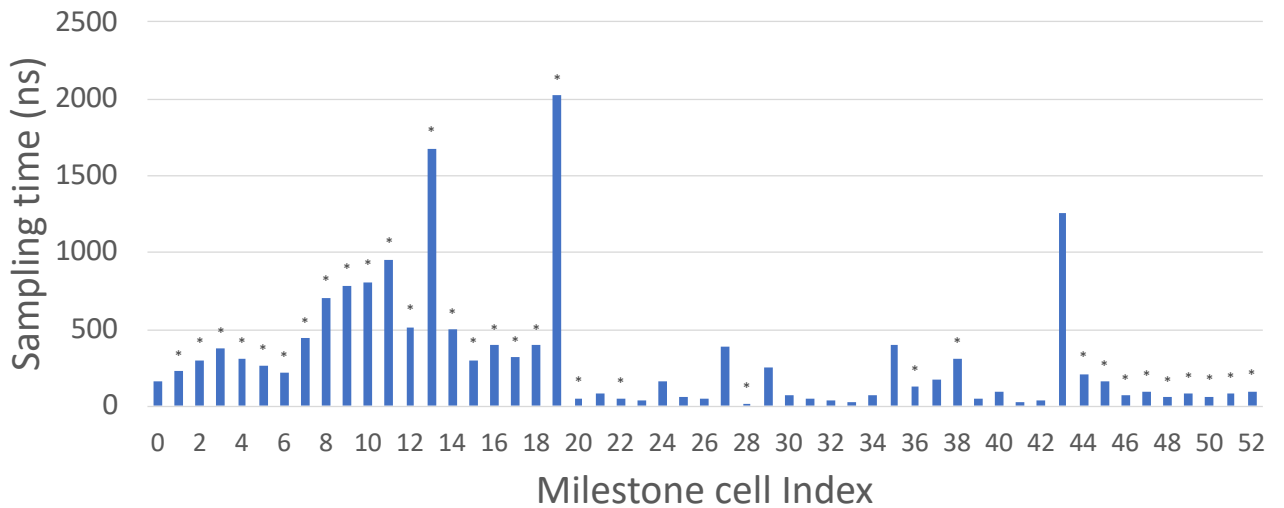

**Figure S2. a)** PMF convergence plots of a Voronoi cell for index 01 ( $B_1$ ) over time. The left and right plots represent the probability of the attempted escape to the left or right milestone states,  $k_{1\rightarrow 0}$  and  $k_{1\rightarrow 2}$ . The middle plot is the retention rate inside the cell. Colors represent different replicas and the mean of all the replicas. **b)** convergence plots for MFPT for milestone cell index 2 ( $B_2$ ). The upper right and lower left panels correspond to the frequencies of transitions from cell 1 to cell 3, and from cell 3 to cell 1, respectively ( $n_{ij,ik}^i$  and  $n_{ik,ij}^i$ ). The upper and lower center panels correspond to the percentage of time spent in cell 2 after last touching cell 1 and 3 ( $r_{ij}^i$ ), respectively. The other two entries are not used in analysis directly but would correspond to re-entering cell 1 or 3 after last visiting that same cell previously. The final 10 ns (last 10,000 frames) windowed relative RMSD is also given at the top of each panel as a measure of the degree of convergence for the corresponding rate matrix entry components. The convergence plots of all 53 cells are available on Github repository <https://github.com/LynaLuo-Lab/Connexin-cAMP-milestoning>. **c)** Total sampling time (ns) for each milestone cell (star indicating multi-replicas).

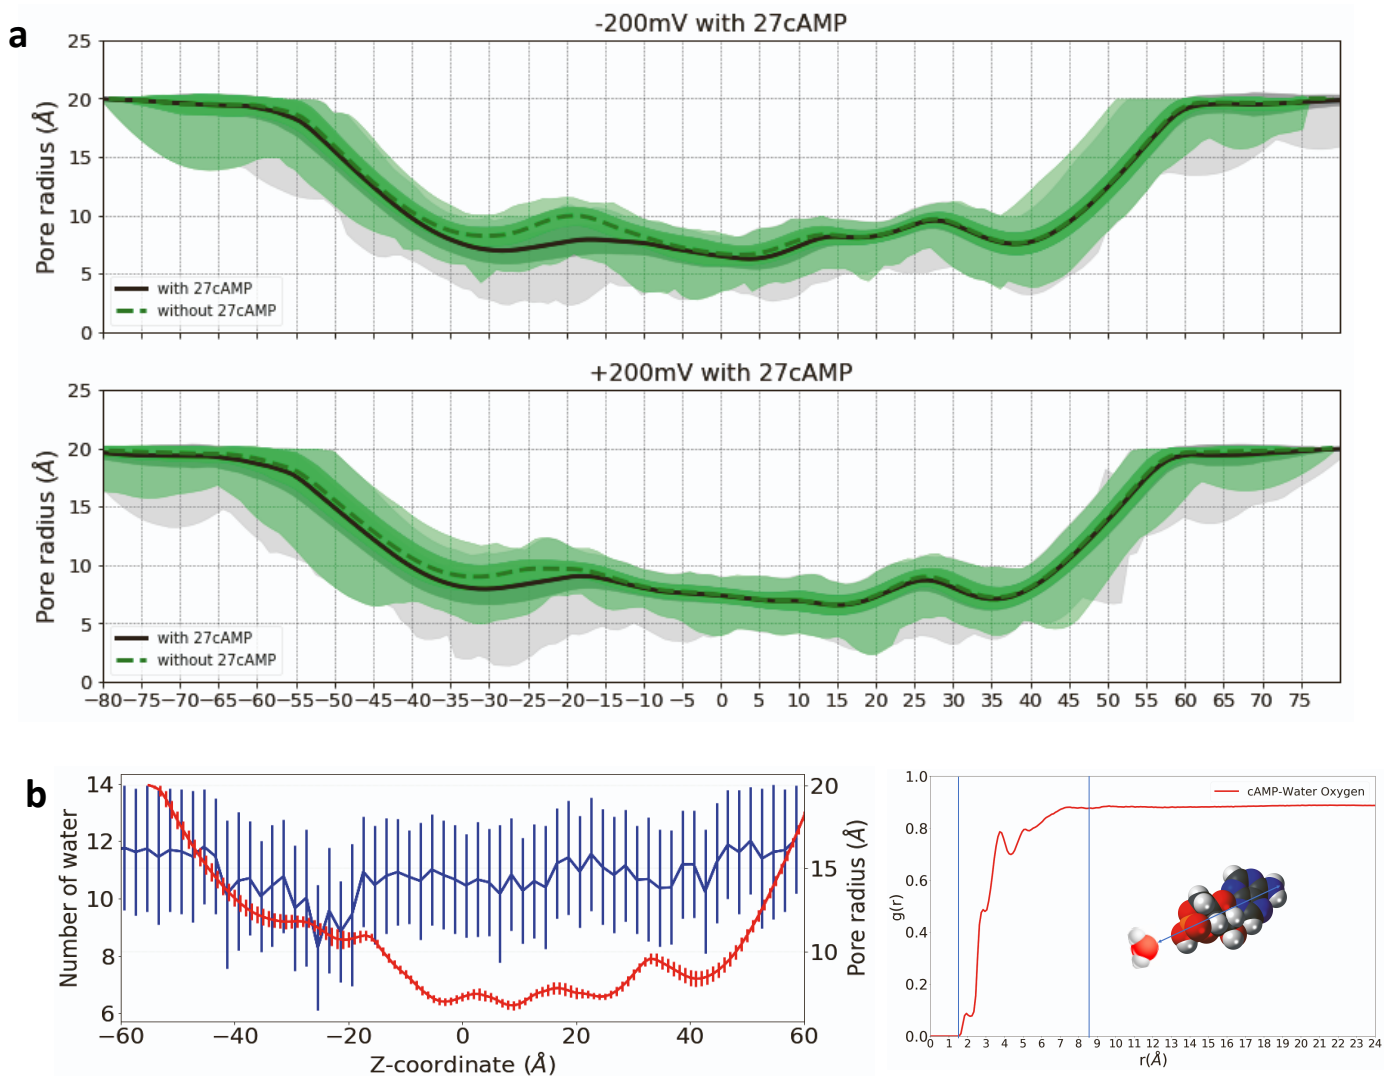

**Figure S3. a)** Pore radius profiles from two simulations under  $\pm 200$  mV, calculated using Hole program. The black line is the average value over last 1  $\mu$ s, with 1.2 ns interval between snapshots. The dark grey shade represents the  $\pm$  standard deviation, the light grey shade represents the minimum and maximum radius values. The dashed line and green shade are the pore radius profile with protein only. **b)** Average and standard deviation of the number of water molecules within 2.15  $\text{\AA}$  of cAMP (blue) at each z-position of the channel lumen computed from milestoning simulations, aligned with the average and standard deviation of pore radius (red). The 2.15 cutoff distance is determined from the radial distribution function of cAMP and water oxygen computed from trajectory of cAMP in bulk (right).

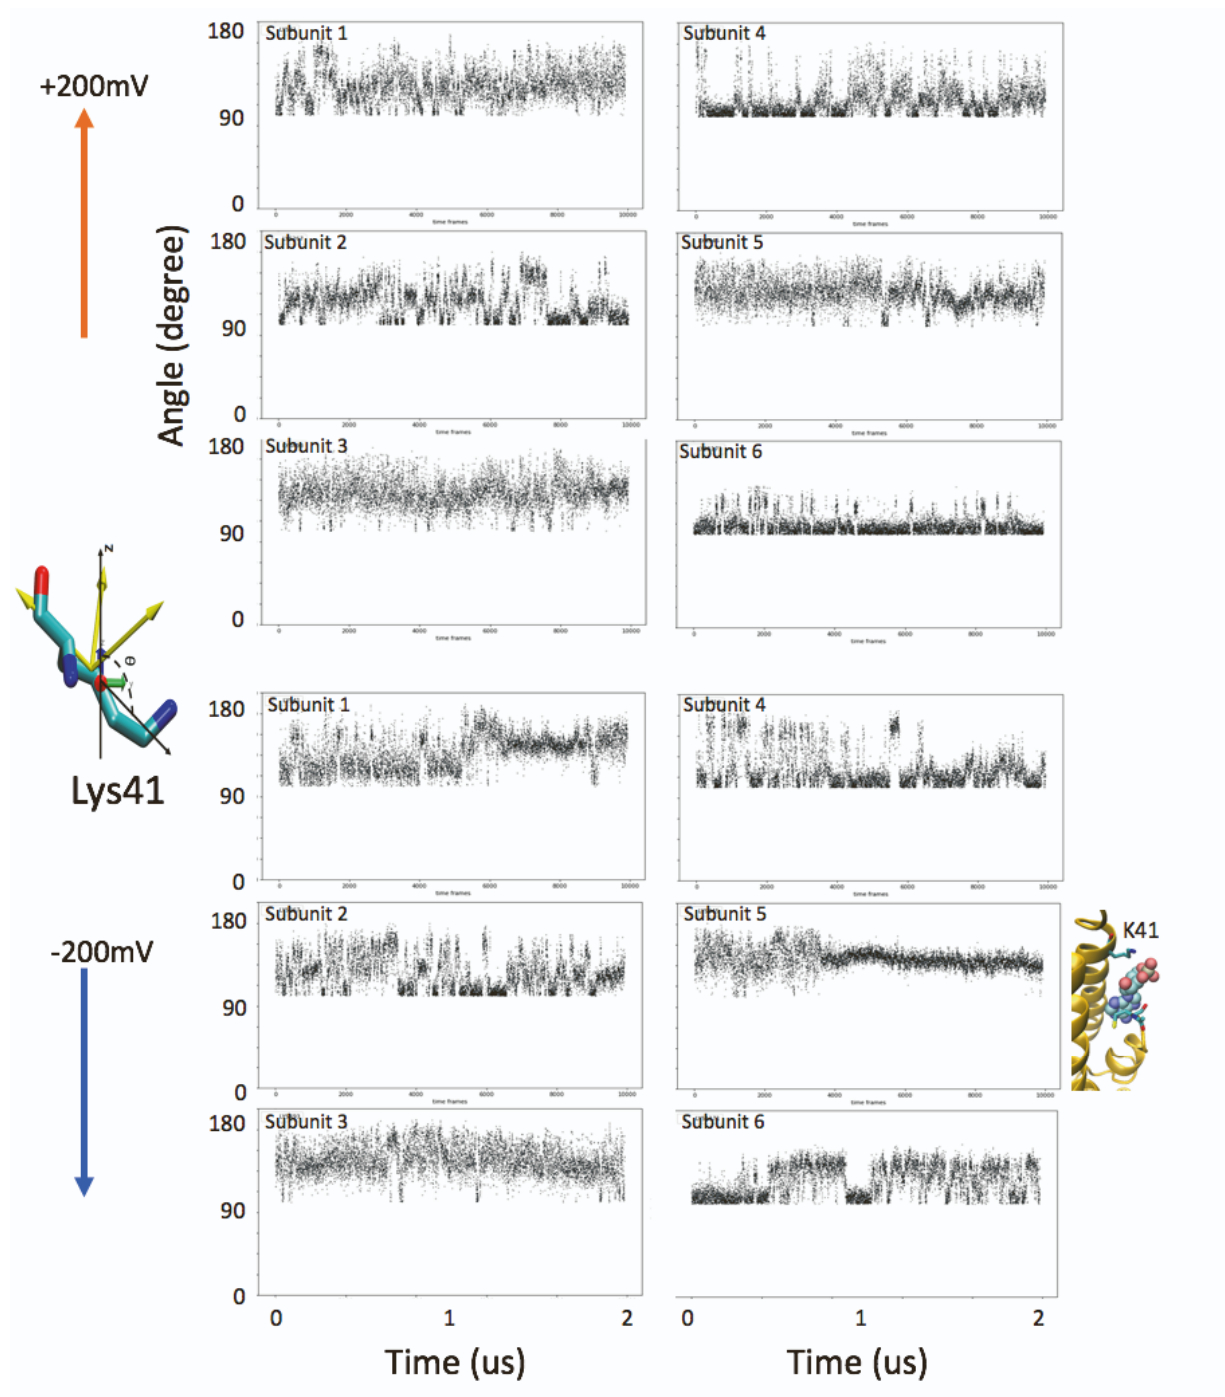

**Figure S4a.** Fluctuation of the angles between the principal axis of Lys41 and z-vector in each subunit under +/-200 mV. Representative Lys residue shown in the licorice model with its principal axes and the angle plotted.

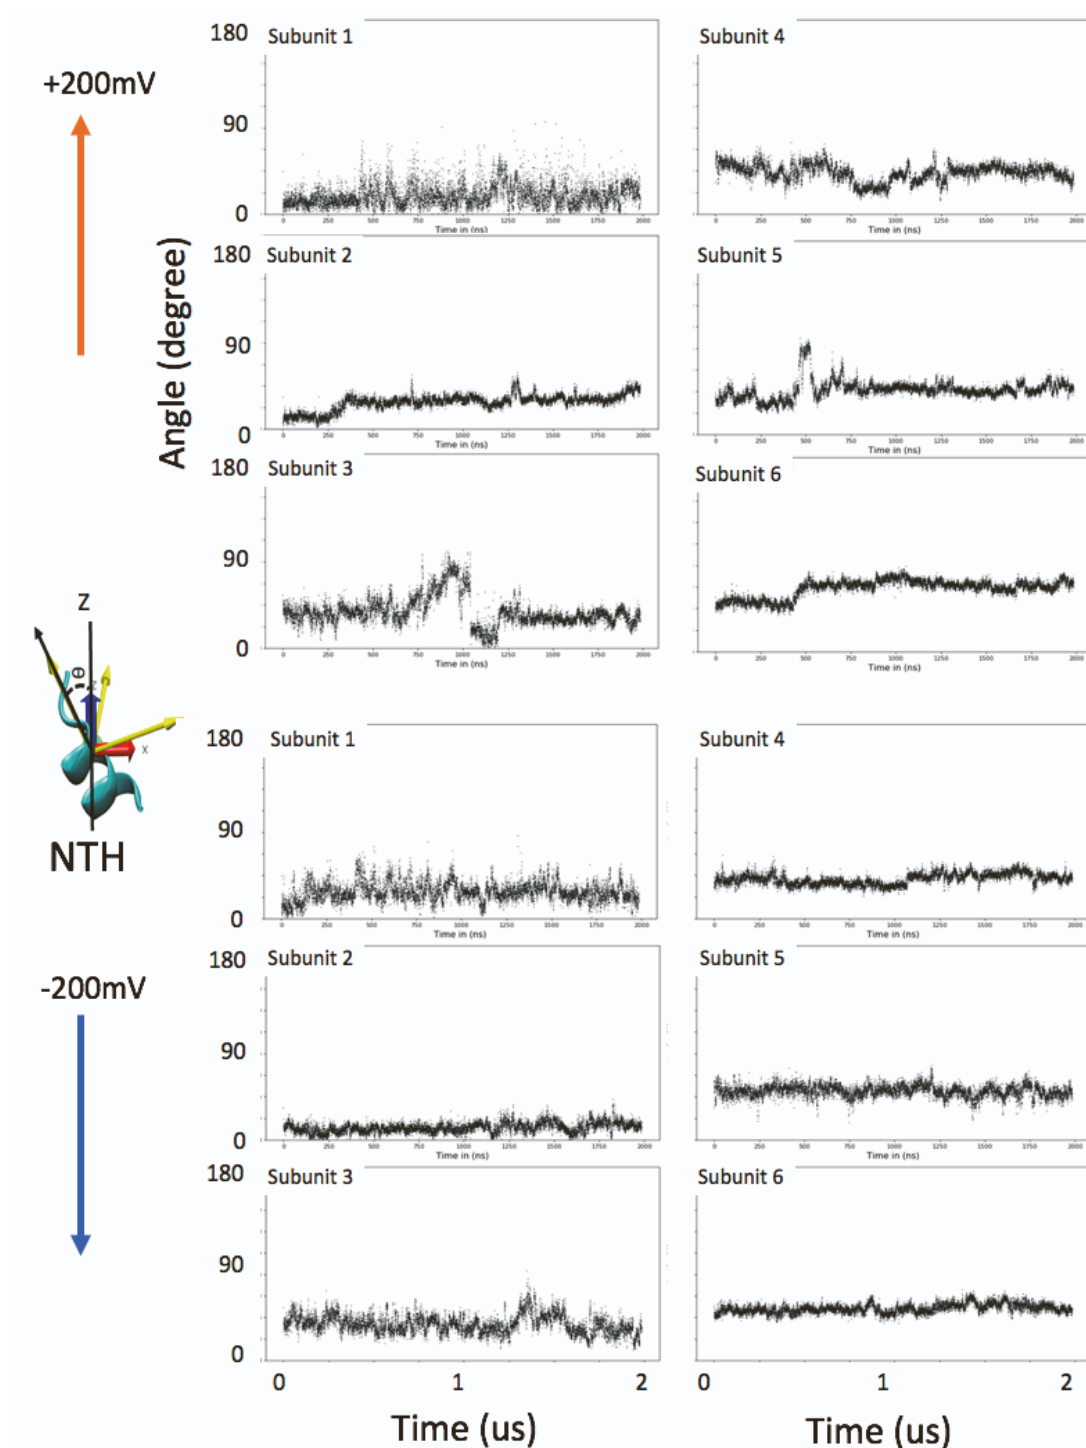

**Figure S4b.** Fluctuation of the angles between the principal axis of NTH (1-11) and z-vector in each subunit under +/-200 mV. Representative NTH shown in the new cartoon model with its principal axes and the angle plotted.

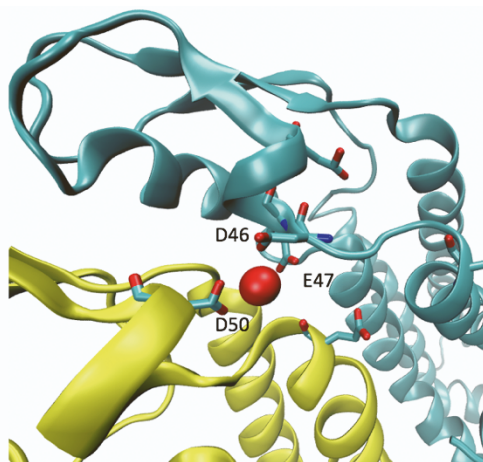

**Figure S5.** One  $Mg^{2+}$  (red ball) binds to the calcium-binding site (D50, D46, E47) for 1.5  $\mu s$  during the voltage simulation, which contains 27  $Mg^{2+}$  in the whole system.

**Table S1.** Optimized CHARMM general force field (CGenFF) parameters for cAMP, available at <https://github.com/LynaLuo-Lab/Connexin-cAMP-milestoning>.

| BONDS     |        |        |        |       |    |       |
|-----------|--------|--------|--------|-------|----|-------|
| CG3RC1    | OG3R60 | 334.3  | 1.411  |       |    |       |
| OG3R60    | PG1    | 237    | 1.61   |       |    |       |
| ANGLES    |        |        |        |       |    |       |
| CG3RC1    | CG321  | OG3R60 | 75.7   | 110.1 |    |       |
| CG321     | CG3RC1 | OG3C51 | 45     | 111.5 |    |       |
| CG3C51    | CG3RC1 | OG3R60 | 58     | 106.5 | 8  | 2.561 |
| CG3RC1    | CG3RC1 | OG3R60 | 53.35  | 111   | 8  | 2.561 |
| OG3R60    | CG3RC1 | HGA1   | 45.9   | 108.5 |    |       |
| CG3C51    | OG3C51 | CG3RC1 | 170    | 109   |    |       |
| CG321     | OG3R60 | PG1    | 20     | 120   | 35 | 2.33  |
| CG3RC1    | OG3R60 | PG1    | 20     | 120   | 35 | 2.33  |
| OG2P1     | PG1    | OG3R60 | 98.9   | 107.5 |    |       |
| OG3R60    | PG1    | OG3R60 | 80     | 104.3 |    |       |
| DIHEDRALS |        |        |        |       |    |       |
| OG3R60    | CG321  | CG3RC1 | CG3RC1 | 0.6   | 1  | 0     |
| OG3R60    | CG321  | CG3RC1 | CG3RC1 | 0.45  | 2  | 0     |
| OG3R60    | CG321  | CG3RC1 | CG3RC1 | 0.7   | 3  | 0     |
| OG3R60    | CG321  | CG3RC1 | OG3C51 | 3.4   | 1  | 180   |
| OG3R60    | CG321  | CG3RC1 | HGA1   | 0.195 | 3  | 0     |

| DIHEDRALS |        |        |        |       |   |     |
|-----------|--------|--------|--------|-------|---|-----|
| OG311     | CG3C51 | CG3RC1 | OG3R60 | 0     | 3 | 0   |
| HGA1      | CG3C51 | CG3RC1 | OG3R60 | 0.195 | 3 | 0   |
| CG3C51    | CG3C51 | OG3C51 | CG3RC1 | 0.5   | 3 | 0   |
| NG2R51    | CG3C51 | OG3C51 | CG3RC1 | 0     | 3 | 0   |
| HGA1      | CG3C51 | OG3C51 | CG3RC1 | 0.3   | 3 | 0   |
| CG321     | CG3RC1 | CG3RC1 | OG3R60 | 0.15  | 3 | 0   |
| OG3C51    | CG3RC1 | CG3RC1 | OG3R60 | 1.2   | 3 | 0   |
| OG3R60    | CG3RC1 | CG3RC1 | HGA1   | 0.15  | 3 | 0   |
| CG321     | CG3RC1 | OG3C51 | CG3C51 | 0.3   | 3 | 0   |
| CG3RC1    | CG3RC1 | OG3C51 | CG3C51 | 0     | 3 | 0   |
| HGA1      | CG3RC1 | OG3C51 | CG3C51 | 0.3   | 3 | 0   |
| CG3C51    | CG3RC1 | OG3R60 | PG1    | 2.553 | 1 | 180 |
| CG3RC1    | CG3RC1 | OG3R60 | PG1    | 1.5   | 1 | 180 |
| CG3RC1    | CG3RC1 | OG3R60 | PG1    | 0.625 | 2 | 180 |
| CG3RC1    | CG3RC1 | OG3R60 | PG1    | 0.488 | 1 | 180 |
| CG3RC1    | CG3RC1 | OG3R60 | PG1    | 0.972 | 3 | 180 |
| HGA1      | CG3RC1 | OG3R60 | PG1    | 1.903 | 1 | 0   |
| HGA1      | CG3RC1 | OG3R60 | PG1    | 0.089 | 3 | 180 |
| CG321     | OG3R60 | PG1    | OG2P1  | 0.1   | 3 | 0   |
| CG321     | OG3R60 | PG1    | OG3R60 | 2.248 | 1 | 180 |
| CG321     | OG3R60 | PG1    | OG3R60 | 0.261 | 2 | 0   |
| CG321     | OG3R60 | PG1    | OG3R60 | 2.64  | 3 | 180 |

|        |        |        |        |       |   |     |
|--------|--------|--------|--------|-------|---|-----|
| HGA2   | CG321  | CG3RC1 | OG3C51 | 0.16  | 3 | 0   |
| CG3RC1 | CG321  | OG3R60 | PG1    | 0.002 | 1 | 180 |
| CG3RC1 | CG321  | OG3R60 | PG1    | 1.14  | 2 | 180 |
| CG3RC1 | CG321  | OG3R60 | PG1    | 0.086 | 3 | 0   |
| HGA2   | CG321  | OG3R60 | PG1    | 0.599 | 3 | 0   |
| CG3RC1 | CG3C51 | CG3C51 | NG2R51 | 0     | 3 | 0   |
| CG3RC1 | CG3C51 | CG3C51 | OG3C51 | 0     | 3 | 0   |
| CG3C51 | CG3C51 | CG3RC1 | OG3R60 | 2     | 3 | 180 |
| CG3C51 | CG3C51 | CG3RC1 | OG3R60 | 0.4   | 5 | 0   |
| CG3C51 | CG3C51 | CG3RC1 | OG3R60 | 0.8   | 6 | 0   |

**Table S2.** Description of the computational systems

|             | Voltage   | term patching | Disulfide bonds                 | Box (Å <sup>3</sup> ) | Number (concentration*) |              |                                                   |            |
|-------------|-----------|---------------|---------------------------------|-----------------------|-------------------------|--------------|---------------------------------------------------|------------|
|             |           |               |                                 |                       | atoms                   | cAMP         | K <sup>+</sup> /Mg <sup>2+</sup> /Cl <sup>-</sup> | POPC/water |
| Anton2      | +/- 200mV | ACE CT1       | C53-C180<br>C60-C174 C64-C169   | 122× 122x 154         | 237030                  | 27 (26.5 mM) | 82/27/163 (80/26/160 mM)                          | 323/56569  |
| Milestoning | 0 mV      | ACE CT1       | C53-C180<br>C60-174<br>C64-C169 | 121x 121x 155         | 234652                  | 1 (1 mM)     | 82/1/137 (81/1/135 mM)                            | 324/56191  |

\*Concentrations were calculated based on number of water molecules.

**Table S3.** Transition time and dwell time (ns) from 2 μs trajectories at +200 mV and -200 mV.

| Transition Event | +200mV (inward flux)     |                      |                           | -200mV (outward flux)    |                      |                           |
|------------------|--------------------------|----------------------|---------------------------|--------------------------|----------------------|---------------------------|
|                  | Transition Time -50<z<50 | Dwell time -50<z<-20 | Barrier crossing -20<z<50 | Transition Time -50<z<50 | Dwell time -50<z<-20 | Barrier crossing -20<z<50 |
| 1                | 222                      | 24                   | 198                       | 160                      | 110                  | 50                        |
| 2                | 1218                     | 1058                 | 160                       | 242                      | 210                  | 32                        |
| 3                | 416                      | 308                  | 108                       | 290                      | 50                   | 240                       |
| 4                | 282                      | 248                  | 34                        | 1496                     | 1400                 | 96                        |
| 5                | 542                      | 498                  | 44                        | 230                      | 162                  | 68                        |
| 6                | 290                      | 149                  | 140                       | 630                      | 570                  | 60                        |
| 7                | 192                      | 120                  | 72                        | 384                      | 350                  | 34                        |
| 8                | 454                      | 222                  | 232                       | 152                      | 100                  | 52                        |

|              |          |         |        |          |          |        |
|--------------|----------|---------|--------|----------|----------|--------|
| 9            | 426      | 150     | 276    | 1410     | 1228     | 182    |
| 10           |          |         |        | 198      | 76       | 122    |
| 11           |          |         |        | 390      | 150      | 240    |
| 12           |          |         |        | 445      | 350      | 95     |
| Raw mean     | 449      | 308     | 140    | 502      | 396      | 105    |
| Sample mean* | 448      | 305     | 143    | 510      | 398      | 106    |
| 95% CI*      | 204-1646 | 149-940 | 79-330 | 249-1571 | 205-1086 | 54-290 |

\*The sample mean and confidence intervals are based on Maximum Likelihood Estimate by fitting the exponential distributions (see code at [https://github.com/LynaLuo-Lab/MD-data-uncertainty-analysis/blob/master/confidence\\_interval\\_exponential.ipynb](https://github.com/LynaLuo-Lab/MD-data-uncertainty-analysis/blob/master/confidence_interval_exponential.ipynb)).
